# 1 **Computational and cellular studies reveal structural destabilization and** 2 **degradation of MLH1 variants in Lynch syndrome**

3  
4 Amanda B. Abildgaard<sup>1</sup>, Amelie Stein<sup>1,\*</sup>, Sofie V. Nielsen<sup>1</sup>, Katrine Schultz-Knudsen<sup>1</sup>,  
5 Elena Papaleo<sup>1,2</sup>, Amruta Shrikhande<sup>3</sup>, Eva R. Hoffmann<sup>3</sup>, Inge Bernstein<sup>4</sup>,  
6 Anne-Marie Gerdes<sup>5</sup>, Masanobu Takahashi<sup>6</sup>, Chikashi Ishioka<sup>6</sup>,  
7 Kresten Lindorff-Larsen<sup>1,\*</sup> and Rasmus Hartmann-Petersen<sup>1,\*</sup>  
8

9 *Running title: Degradation of cancer-linked MLH1 variants*

10 *Keywords: protein folding, misfolding, protein quality control, proteasome, HSP70*

11  
12 1: The Linderstrøm-Lang Centre, Department of Biology, University of Copenhagen, Ole Maaløes  
13 Vej 5, DK-2200 Copenhagen, Denmark.

14 2: Current address: Computational Biology Laboratory, Danish Cancer Society Research Center,  
15 Strandboulevarden 49, DK-2100 Copenhagen, Denmark.

16 3: Department of Cellular and Molecular Medicine, University of Copenhagen, Blegdamsvej 3B, DK-  
17 2200 Copenhagen, Denmark.

18 4: Department of Surgical Gastroenterology, Aalborg University Hospital, DK-9000 Ålborg,  
19 Denmark.

20 5: Department of Clinical Genetics, Rigshospitalet, Blegdamsvej 9, DK-2100 Copenhagen, Denmark.

21 6: Tohoku University Hospital, Tohoku University, Sendai, Japan.

22  
23 \*Corresponding authors: A.S. ([amelie.stein@bio.ku.dk](mailto:amelie.stein@bio.ku.dk)), K.L.-L. ([lindorff@bio.ku.dk](mailto:lindorff@bio.ku.dk)) and R.H.-P.  
24 ([rhpetersen@bio.ku.dk](mailto:rhpetersen@bio.ku.dk)).

25 **Abstract**

26 Defective mismatch repair leads to increased mutation rates, and germline loss-of-function variants  
27 in the repair component MLH1 cause the hereditary cancer predisposition disorder known as Lynch  
28 syndrome. Early diagnosis is important, but complicated by many variants being of unknown  
29 significance. Here we show that a majority of the disease-linked MLH1 variants we studied are  
30 present at reduced cellular levels. We show that destabilized MLH1 variants are targeted for  
31 chaperone-assisted proteasomal degradation, resulting also in degradation of co-factors PMS1 and  
32 PMS2. *In silico* saturation mutagenesis and computational predictions of thermodynamic stability of  
33 MLH1 missense variants revealed a correlation between structural destabilization, reduced steady-  
34 state levels and loss-of-function. Thus, we suggest that loss of stability and cellular degradation is an  
35 important mechanism underlying many *MLH1* variants in Lynch syndrome. Combined with analyses  
36 of conservation, the thermodynamic stability predictions separate disease-linked from benign *MLH1*  
37 variants, and therefore hold potential for Lynch syndrome diagnostics.

38

39

## 40 **Introduction**

41 The DNA mismatch repair (MMR) pathway corrects mismatched base pairs inserted during  
42 replication. The MutS $\alpha$  (MSH2-MSH6) heterodimer initiates repair by detecting the mismatch after  
43 which the MutL $\alpha$  (MLH1-PMS2) heterodimer promotes the process by generating a nick in the newly  
44 synthesized DNA strand, thereby stimulating downstream repair proteins (Jiricny, 2006; Jun et al.,  
45 2006). The MMR pathway is phylogenetically highly conserved, emphasizing its importance as a key  
46 DNA repair mechanism of the cell (Jiricny, 2013; Sachadyn, 2010). Loss of MMR activity causes  
47 genome instability, and can result in both sporadic and inherited cancer, such as Lynch Syndrome  
48 (LS) (OMIM: #609310), also known as hereditary nonpolyposis colorectal cancer (HNPCC). The  
49 predominant consequence of LS is colorectal cancer (CRC), making LS the underlying reason for  
50 around 4% of all CRC cases (Aarnio et al., 1999; Hampel et al., 2008; Sijmons & Hofstra, 2016;  
51 Vasen et al., 1996; Vasen & de Vos Tot Nederveen Cappel WH, 2013; Thompson et al., 2014; Moller  
52 et al., 2018). Importantly, the cumulative lifetime cancer risk varies considerably between patients  
53 and depends on the specific germline mutation in the genes encoding the key mismatch repair proteins  
54 MSH2, MSH6, MLH1, and PMS2 (Barrow et al., 2008; Dowty et al., 2013; Dunlop et al., 1997;  
55 Lynch et al., 2015; Peltomaki et al., 1993; Plaschke et al., 2004; Sijmons & Hofstra, 2016).

56 The majority of LS cases result from *MLH1* and *MSH2* mutations (Peltomaki, 2016), many of which  
57 are missense mutations (Heinen, 2010; Palomaki et al., 2009; Peltomaki & Vasen, 1997; Peltomaki,  
58 2016). Evidently, such missense mutations may cause loss-of-function by directly perturbing protein-  
59 protein interactions or ablating enzymatic activity. Many missense mutations, however, cause loss-  
60 of-function by inducing structural destabilization of the protein (Stein et al., 2019), which in turn may  
61 trigger protein misfolding and degradation by the ubiquitin-proteasome system (UPS) (Kampmeyer  
62 et al., 2017; Nielsen et al., 2014; Kriegenburg et al., 2014). As a result, the cellular amount of a  
63 missense protein may be reduced to an insufficient level, which can ultimately cause disease (Ahner

64 et al., 2007; Casadio et al., 2011; Matreyek et al., 2018; Nielsen et al., 2017), as we and others have  
65 previously shown for LS-linked variants of MSH2 (Gammie et al., 2007; Arlow et al., 2013; Nielsen  
66 et al., 2017).

67 In this study, we investigated whether this is the case for LS-linked variants of the MLH1 protein.  
68 We determined cellular abundance for 69 missense variants, and show that several destabilized LS-  
69 linked MLH1 variants are targeted for chaperone-assisted proteasomal degradation and are therefore  
70 present at reduced cellular amounts. In turn, this lower amount of MLH1 results in degradation of the  
71 MLH1-binding proteins PMS1 and PMS2. *In silico* saturation mutagenesis and computational  
72 prediction of the thermodynamic stability of all possible MLH1 single site missense variants revealed  
73 a correlation between the structural destabilization of MLH1, reduced steady-state levels and the loss-  
74 of-function phenotype. Accordingly, the thermodynamic stability predictions accurately separate  
75 disease-linked *MLH1* missense mutations from benign *MLH1* variants (area under the curve is 0.82  
76 in a receiver-operating characteristic analysis), and therefore hold potential for classification of *MLH1*  
77 missense variants of unknown consequence, and hence for LS diagnostics. Further, by suggesting a  
78 mechanistic origin for many LS-causing *MLH1* missense variants our studies provide a starting point  
79 for development of novel therapies.

80

81

## 82 **Results**

83

### 84 ***In silico* saturation mutagenesis and thermodynamic stability predictions**

85 Most missense proteins are less structurally stable than the wild-type protein (Tokuriki & Tawfik,  
86 2009), and individual missense variants may thus lead to increased degradation and insufficient  
87 amounts of protein. To comprehensively assess this effect for MLH1, we performed energy  
88 calculations based on crystal structures of MLH1 to predict the consequences of missense mutations  
89 in *MLH1* on the thermodynamic stability of the MLH1 protein structure. Full-length human MLH1  
90 is a 756 residue protein which forms two folded units, an N-terminal domain (residues 7-315) and a  
91 C-terminal domain (residues 502-756) (Mitchell et al., 2019) separated by a flexible and intrinsically  
92 disordered linker (Fig. 1A). Using the structures (Wu et al., 2015) of the two domains (PDB IDs 4P7A  
93 and 3RBN) (Fig. 1A), we performed *in silico* saturation mutagenesis, introducing all possible single  
94 site amino acid substitutions into the wild-type MLH1 sequence at the 564 structurally resolved  
95 residues. We then applied the FoldX energy function (Schymkowitz et al., 2005) to estimate the  
96 change in thermodynamic folding stability compared to the wild-type MLH1 protein ( $\Delta\Delta G$ ) (Fig.  
97 1BC). Negative values indicate mutations that are predicted to stabilize MLH1, while positive values  
98 indicate that the mutations may destabilize the protein. Thus, those variants with  $\Delta\Delta G$  predictions  $>$   
99 0 kcal/mol are expected to have a larger population of fully or partially unfolded structures that, in  
100 turn, may be prone to protein quality control (PQC)-mediated degradation. Our saturation  
101 mutagenesis dataset comprises 19 (amino acids, excluding the wild-type residue) \* 564 (residues  
102 resolved in the N- and C-terminal structures) = 10,716 different MLH1 variants, thus covering 75%  
103 of all possible missense variants in MLH1. We illustrate a subsection as a heat map in Fig. 1D (the  
104 entire dataset is included in the supplemental material, supplemental material file 1). The predictions  
105 reveal that 34% of the substitutions are expected to change the stability of MLH1 by less than 0.7

106 kcal/mol, which is the typical error of the predictions (Guerois et al., 2002) (Fig. 1E). A comparable  
107 fraction (32%) are, however, predicted to cause a substantial destabilization ( $>2.5$  kcal/mol) of the  
108 MLH1 protein (Fig. 1E).

109

### 110 **Thermodynamic stability calculations predict severely reduced MLH1 steady-state levels**

111 To test whether the *in silico* stability predictions are predictive of cellular stability, abundancy, and  
112 function, we selected 69 naturally occurring MLH1 missense variants with predicted  $\Delta\Delta G$ s spanning  
113 from  $-1.6$  to  $>15$  kcal/mol (Table 1). We further ensured that the selected mutations were distributed  
114 throughout the *MLH1* gene, thus probing the entire structured parts of the MLH1 protein (Fig. 1A).  
115 Then, the variants were introduced into *MLH1*-negative HCT116 cells and analyzed by automated  
116 immunofluorescence microscopy using a polyclonal antiserum to MLH1.

117 As expected, wild-type MLH1 localized primarily to the nucleus (Fig. 2A). This localization pattern  
118 was also observed for all the MLH1 variants, and we did not detect any protein aggregates. We did,  
119 however, observe large variations in the fluorescence intensity, and consequently the steady-state  
120 protein levels, between the different MLH1 variants (Fig. 2A). To quantify these differences, we first  
121 excluded the non-transfected cells using the intensity in the non-transfected control. Then we  
122 measured the total intensity of the MLH1 fluorescence in each cell and normalized to the intensity  
123 for wild-type MLH1. This analysis revealed up to 12-fold difference in intensity between the variants  
124 showing sizable differences in abundance.

125 To examine whether these variations in cellular abundance is correlated with thermodynamic  
126 stability, we plotted the normalized values against the predicted structural stabilities ( $\Delta\Delta G$ s). This  
127 analysis indeed reveals that those MLH1 variants that were predicted to be structurally destabilized  
128 (high  $\Delta\Delta G$ s) also displayed reduced steady-state levels (Fig. 2B), indicating that the predicted  
129 structural destabilization and low steady-state MLH1 levels go hand in hand. Almost all (30 out of

130 31) variants with steady state > 75% have a  $\Delta\Delta G < 3$  kcal/mol, and similarly most (22/23) with  $\Delta\Delta G$   
131 > 3 kcal/mol have steady state levels <75%. A destabilization of 3 kcal/mol is relatively low threshold,  
132 but consistent with previous observations of other unrelated proteins (Nielsen et al., 2017; Scheller et  
133 al., 2019; Bullock et al., 2000). Such low stability thresholds may indicate that local unfolding  
134 (discussed below) plays an important role in the recognition and degradation of pathogenic variants,  
135 and/or reflect that wild-type MLH1 is a marginally stable protein. To test this, cell lysates were  
136 incubated for 30 min. at a range of temperatures. Then the lysates were separated into soluble  
137 (supernatant) and insoluble (pellet) fractions by centrifugation, and the amount of soluble MLH1 was  
138 determined by blotting (Fig. 2 – figure supplement 1). Comparison with abundant cellular proteins  
139 stained by Ponceau S and blotting for GAPDH, revealed that wild-type MLH1 appears somewhat less  
140 thermostable than these other proteins (Fig. 2 – figure supplement 1), supporting that MLH1 may  
141 indeed be marginally stable.

142 Given that decreased levels of MLH1 protein could cause loss of MMR function, we also examined  
143 whether cellular abundancy correlated with pathogenicity. Of the 69 variants that we studied, 29 are  
144 classified as pathogenic or likely pathogenic in the ClinVar database (Landrum et al., 2018), whereas  
145 12 are (likely) benign, and 28 are variants of unknown significance. We found that all (likely) benign  
146 variants appeared stable and had steady-state levels >70% (Fig. 2B). Conversely, 18 out of the 29  
147 pathogenic variants (62%) had steady-state levels < 70% (Fig. 2B), suggesting that protein  
148 destabilization is a common feature for more than half of the MLH1 variants linked to LS, and that  
149 predictions of stability might be useful for classifying such variants (see below).

150 Next, we analyzed how the measured steady-state levels and the stability predictions correlated with  
151 previously published *in vivo* functional data on MLH1 (Takahashi et al., 2007). In that study, MLH1  
152 function was tested in a number of assays and ranked from 0 (no function) to 3 (full function) based  
153 on their dominant mutator effect (DME) when human MLH1 variants are expressed in yeast cells

154 (Shimodaira et al., 1998). Our comparison revealed that variants with reduced steady-state levels and  
155 high risk of destabilization in general are less likely to be functional (Fig. 2CD), which again indicates  
156 that the reduced structural stability may be linked to the observed loss-of-function phenotype. For  
157 example, while 22/23 variants with DME=3 have steady-state levels >70%, only five of the 23  
158 variants with DME=0 have this high amount of protein. These functional differences are also reflected  
159 in the correlation between loss of stability ( $\Delta\Delta G$ ) and function (Fig. 2D). In particular none of the  
160 fully functional proteins (DME=3) are predicted to be destabilized by more than 3 kcal/mol, whereas  
161 18/23 variants with DME=0 are predicted to be destabilized by at least this amount. The unstable and  
162 non-functional variants do not appear structurally clustered to a particular site within the protein, and  
163 are found throughout both the N- and C-terminal domains of MLH1 (Fig. 2E). These affected  
164 positions are, however, closer to one another than random pairs in the respective domain (average  
165 pairwise distances of 17.3 Å vs. 24.1 Å in the N-terminal domain, and 14.7 Å vs. 21.0 Å in the C-  
166 terminal domain). In contrast, the linker region is depleted in detrimental variants but not in benign  
167 variants, hence functional (Takahashi et al., 2007) and benign (Landrum et al., 2018) variants are  
168 found both in structured and unstructured regions (Fig. 2, figure supplement 2).

169

### 170 **Proteasomal degradation causes reduced steady-state levels of destabilized MLH1 variants**

171 Next, we analyzed why the steady-state levels of certain MLH1 variants were reduced. For this  
172 purpose, we carefully selected eight of the 69 missense MLH1 variants for further in-depth analyses  
173 (E23D, G67R, R100P, T117M, I219V, R265C, K618A, and R659P). As previously, these variants  
174 were chosen so the mutations were distributed across the *MLH1* gene, and to represent a broad range  
175 of predicted structural stabilities ( $\Delta\Delta G$ s) as well as different pathogenicity annotations from the  
176 ClinVar database (Table 1).



177 The variants were transiently transfected into HCT116 cells. Indeed, six of the variants (G67R,  
178 R100P, T117M, R265C, K618A, R659P) displayed reduced steady-state levels, while wild type-like  
179 levels were observed for two variants (E23D, I219V), in agreement with the fluorescence-based  
180 observations (Fig. 3AB). Co-transfection with a GFP-expression vector revealed that this was not  
181 caused by differences between transfection efficiencies since the amount of GFP was unchanged (Fig.  
182 3A).

183 Next, in order to investigate if the reduced MLH1 levels were caused by degradation, we monitored  
184 the amounts of MLH1 over time in cultures treated with the translation inhibitor cycloheximide  
185 (CHX). This revealed that those variants with reduced steady-state levels were indeed rapidly  
186 degraded (half-life between 3 and 12 hours), whereas wild-type MLH1 and the other variants  
187 appeared stable (estimated half-life  $\gg$  12 hours) (Fig. 3CD). Treating the cells with the proteasome-  
188 inhibitor bortezomib (BZ) significantly increased the steady-state levels of the unstable variants,  
189 whereas the levels of the wild-type and stable MLH1 variants were unaffected (Fig. 3E). Separating  
190 cell lysates into soluble and insoluble fractions by centrifugation revealed that the destabilized MLH1  
191 variants appeared more insoluble than the stable MLH1 variants, and bortezomib treatment mainly  
192 caused an increase in the amount of insoluble MLH1 (Fig. 3, figure supplement). Based on these  
193 results, we conclude that certain missense MLH1 variants are structurally destabilized, which in turn  
194 leads to proteasomal degradation and reduced steady-state protein levels, and a loss-of-function  
195 phenotype as scored by the DME.

196

### 197 **PMS1 and PMS2 are destabilized when MLH1 is degraded**

198 In order to carry out its role in MMR, it is essential that MLH1 associates with PMS2 to form the  
199 active MutLa complex (Li & Modrich, 1995; Raschle et al., 2002; Tomer et al., 2002). Additionally,

200 MLH1 can bind the PMS1 protein and form the MutL $\beta$  complex, the function of which remains  
201 unknown (Cannavo et al., 2007; Kondo et al., 2001; Wu et al., 2003).

202 As typical for “orphan” proteins lacking their binding partners (Yanagitani et al., 2017; McShane et  
203 al., 2016), PMS2 has been found to be unstable in the absence of MLH1 (Hinrichsen et al., 2017;  
204 Lynch et al., 2015; Mohd et al., 2006; Perera & Bapat, 2008). To test the mechanism underlying this  
205 instability, we measured the stability of endogenous PMS1 and PMS2 in HCT116 cells with or  
206 without introducing wild-type MLH1. In cells treated with cycloheximide, the absence of MLH1 led  
207 to rapid degradation of both PMS1 and PMS2 ( $t_{1/2} \sim 3$ -5 hours). However, when wild-type MLH1 was  
208 present, PMS1 and PMS2 were dramatically stabilized ( $t_{1/2} \sim 12$  hours) (Fig. 4AB). Treating  
209 untransfected HCT116 cells with bortezomib led to an increase in the amount of endogenous PMS1  
210 and PMS2, showing that their degradation is proteasome-dependent (Fig. 4C). The stabilizing effect  
211 of MLH1 on PMS1 and PMS2 was also observed for the stable MLH1 variants (Fig. 4DE).  
212 Accordingly, we found that the MLH1 levels correlated with the PMS1 and PMS2 levels (Fig. 4F).  
213 Collectively, these results suggest that either there is not enough MLH1 variant in the cells to form  
214 complexes with PMS1/2 or that only stable MLH1 variants are able to bind PMS1 and PMS2, and  
215 that this binding in turn protects PMS1 and PMS2 from proteasomal degradation. To test these  
216 possibilities, we proceeded to assess the PMS2-binding activity of the selected MLH1 variants. To  
217 this end, HCT116 cells were co-transfected with both MLH1 and YFP-tagged PMS2. Importantly,  
218 the overexpressed YFP-PMS2 protein did not affect the MLH1 level and appeared stable in the  
219 absence of MLH1 (Fig. 4G), allowing us to directly compare the PMS2-binding activity of the  
220 selected MLH1 variants. To ensure that the cells contained sufficient levels of the unstable MLH1  
221 variants, the cells were treated with bortezomib prior to lysis. We found that the wild-type and stable  
222 MLH1 variants (E23D, I219V) were efficiently co-precipitated with the YFP-tagged PMS2 (Fig. 4H).  
223 Several of the unstable MLH1 variants did not display appreciable affinity for PMS2, even after

224 blocking their degradation, suggesting that these MLH1 variants are structurally perturbed or  
225 unfolded to an extent that disables complex formation with PMS2. Interestingly, the K618A variant  
226 displayed a strong interaction with PMS2 (Fig. 4H), indicating that this unstable variant retains the  
227 ability to bind PMS2, and therefore potentially engage in mismatch repair. We note that this result is  
228 supported by the K618A variant's ability to stabilize PMS2 (Fig. 4E) and the distal positioning of  
229 K618 to the PMS2 binding site (Gueneau et al., 2013).

230

### 231 **HSP70 is required for degradation of some destabilized MLH1 variants**

232 Since structurally destabilized proteins are prone to expose hydrophobic regions that are normally  
233 buried in the native protein conformation, molecular chaperones, including the prominent HSP70 and  
234 HSP90 enzymes, often engage such proteins in an attempt to refold them or to target them for  
235 proteasomal degradation (Arndt et al., 2007). Indeed, both HSP70 and HSP90 are known to interact  
236 with many missense variants though with different specificities and cellular consequences (Karras et  
237 al., 2017), and a previous study has linked HSP90 to MLH1 function (Fedier et al., 2005).

238 To test the involvement of molecular chaperones in degradation of the selected MLH1 variants, we  
239 analyzed their interaction with HSP70 and HSP90 by co-immunoprecipitation and Western blotting.  
240 Similar to above, the cells were treated with bortezomib to ensure detectable amounts of MLH1.  
241 Interestingly, four of the destabilized MLH1 variants (G67R, R100P, T117M and R265C) displayed  
242 a strong interaction with HSP70, up to approximately 7-fold greater compared to wild-type MLH1  
243 (Fig. 5AB). Conversely, in the case of HSP90 we observed binding to all the tested MLH1 variants,  
244 including the wild-type (Fig. 5CD), suggesting that HSP90 may be involved in the *de novo* folding  
245 of wild-type MLH1 or assembly of MLH1-containing MMR complexes, while HSP70 may be  
246 involved in regulation of certain destabilized MLH1 variants, potentially playing a role in their  
247 degradation.

248 To test this hypothesis, we measured the steady-state levels of the MLH1 variants following inhibition  
249 of HSP70 and HSP90, respectively. We treated cells with the HSP70 inhibitor YM01 or the HSP90  
250 inhibitor geldanamycin (GA) and compared with the MLH1 levels in untreated cells. In comparison  
251 to the HSP70 binding, the effect of YM01 appeared more subtle. The levels of three variants (G67R,  
252 R100P, T117M) were, however, increased (Fig. 5EF), and all three were also found to bind HSP70  
253 (Fig. 5A) and had the lowest steady-state levels of the eight tested variants prior to HSP70 inhibition.  
254 Together, these results suggest that HSP70 actively partakes in detecting and/or directing certain  
255 destabilized MLH1 variants for degradation. We did not observe any effect of HSP90 inhibition on  
256 the MLH1 protein levels for any of the tested variants (Fig. 5GH).

#### 257 258 **Structural stability calculations for predicting pathogenic mutations**

259 Our results show that unstable protein variants are likely to be rapidly degraded, suggesting that  
260 predictions of changed thermodynamic stability of missense MLH1 variants could be used to estimate  
261 whether a particular MLH1 missense variant is pathogenic or not. In comparison with the sequence-  
262 based tools (e.g. PolyPhen2, PROVEAN) that are currently employed in the clinic (Adzhubei et al.,  
263 2010; Choi & Chan, 2015), the FoldX energy predictions provide an orthogonal structure-based and  
264 sequence-conservation-independent prediction of whether a mutation is likely to be pathogenic.  
265 Unlike most variant consequence predictors, FoldX was not trained on whether mutations were  
266 benign or pathogenic, but solely on biophysical stability measurements (Guerois et al., 2002). This  
267 considerably reduces the risk of overfitting to known pathogenic variants. More importantly, because  
268 of the mechanistic link to protein stability, FoldX predictions enable insights into why a particular  
269 mutation is problematic (Kiel & Serrano, 2014; Kiel et al., 2016; Pey et al., 2007; Nielsen et al., 2017;  
270 Stein et al., 2019).

271 As a first test for utilizing the biophysical calculations, we analyzed the predicted protein stabilities  
272 of MLH1 variants reported in the >140,000 exomes available in the Genome Aggregation Database  
273 (gnomAD) (Lek et al., 2016; Karczewski et al., 2019). Gratifyingly, this revealed that those variants  
274 reported to occur at a high frequency in the population all displayed low  $\Delta\Delta G$  values (Fig. 6A),  
275 suggesting that these MLH1 proteins are stable. Accordingly, with only a few exceptions, the most  
276 common MLH1 alleles reported in gnomAD also appeared functional (high DME scores) (Fig. 6A).  
277 To further test the performance of the structural stability calculations for identifying pathogenic  
278 MLH1 variants, we then compared the  $\Delta\Delta G$  values for ClinVar-annotated MLH1 variants. This  
279 revealed that the benign MLH1 variants all appeared structurally stable, while many pathogenic  
280 variants appeared destabilized (Fig. 6B). For example, 15 of the 28 pathogenic variants (54%) for  
281 which we could calculate a stability change have  $\Delta\Delta G > 3$  kcal/mol and 20 (71%) have  $\Delta\Delta G > 2$   
282 kcal/mol, whereas none of the 11 benign variants have  $\Delta\Delta G > 1.5$  kcal/mol. Applying this calculation  
283 to all MLH1 missense variants in ClinVar revealed similar trends, with 55/95 (57%) of the pathogenic  
284 variants having  $\Delta\Delta G > 3$  kcal/mol, while only 2/21 benign variants have  $\Delta\Delta G > 1.5$  kcal/mol.  
285 Overall, while many pathogenic variants are severely destabilized, a subset of these are predicted to  
286 be as stable as non-pathogenic variants (e.g. 7/28 have predicted  $\Delta\Delta G < 1.0$  kcal/mol). This  
287 observation could be explained e.g. by inaccuracies of our stability calculations or by loss of function  
288 via other mechanisms such as direct loss of enzymatic activity, post-translational modifications or  
289 protein-protein interactions (Wagih et al., 2018). Thus, as a separate method for predicting the  
290 biological consequences of mutations, we explored if sequence analysis of the MLH1 protein family  
291 across evolution would reveal differences in selective pressure between benign and pathogenic  
292 variants. We performed an analysis of a multiple sequence alignment of MLH1 homologs, which  
293 considers both conservation at individual sites, but also non-trivial, co-evolution between pairs of  
294 residues (Balakrishnan et al., 2011; Stein et al., 2019). Turning this data into a statistical model

295 allowed us to score all possible missense MLH1 variants. As this statistical sequence model is based  
296 on homologous sequences shaped by evolutionary pressures, it is expected to capture which residues,  
297 and pairs of residues, are tolerated (Balakrishnan et al., 2011). As opposed to stability calculations  
298 via e.g. FoldX, this approach is not directly linked to an underlying mechanistic model. Thus, we  
299 generally expect destabilizing residues to be recognized as detrimental by both FoldX and the  
300 evolutionary statistical energies, while variants in functionally active sites might only be recognized  
301 by the latter, if they do not affect protein stability (Stein et al., 2019). On the other hand, stability  
302 calculations could capture effects specific to human MLH1 that are more difficult to disentangle  
303 through the sequence analyses. In our implementation, low scores indicate mutations that during  
304 evolution appear tolerated, while high scores mark amino acid substitutions that are rare and therefore  
305 more likely to be detrimental to protein structure and/or function. Indeed, the average sequence-based  
306 score for the benign variants is lower (variations more likely to be tolerated) than the average for the  
307 ClinVar-curated pathogenic variants (Fig. 6C). The full matrix of evolutionary statistical energies is  
308 included in the supplemental material (supplemental material file 2).

309 Next, we compared the structure-based stability calculations and evolutionary statistical energies in  
310 a two-dimensional landscape of variant tolerance (Fig. 6D), which we find largely agrees with the  
311 functional classification by Takahashi *et al.* (Takahashi et al., 2007). There are, however, three  
312 variants with low evolutionary statistical energies (typically indicating tolerance), but predicted and  
313 experimentally-confirmed to be destabilized relative to wild-type MLH1 (T662P, I565F, G244V).  
314 Further, a number of stable variants have high DME scores (indicating wild-type-like function), but  
315 also high evolutionary statistical energies, indicating likely loss of function, and indeed several of  
316 these are classified as pathogenic in ClinVar (Fig. 6, figure supplements 1 and 2). One possible  
317 explanation for these discrepancies is a different sensitivity in the employed yeast assays (Takahashi  
318 et al., 2007), i.e., these variants may be sufficiently functional under assay conditions, but their

319 impaired function relative to wild-type MLH1 may nevertheless render them pathogenic in human  
320 variant carriers.

321 To exploit the complementary nature that  $\Delta\Delta G$  and evolutionary sequence energies display for a  
322 subset of the variants, we applied logistic regression to combine these two metrics. In a jackknife test  
323 (to avoid overfitting) we found that 99 of 116 (85%) ClinVar (Landrum et al., 2018) missense variants  
324 were classified correctly by the regression model (Fig. 6E).

325 To compare the capability of the above-described evolutionary statistical energies, FoldX, our  
326 regression model, and more traditional sequence-based methods (PolyPhen2, PROVEAN and  
327 REVEL) in separating pathogenic and non-pathogenic variants, we applied these approaches to the  
328 set of 116 known benign and disease-causing MLH1 variants. We then used receiver-operating  
329 characteristic (ROC) analyses to compare how well the different methods are able to distinguish the  
330 21 benign variants from the 95 known pathogenic variants (Fig. 6F and Fig. 6, figure supplement 3).  
331 The results show that although all predictors perform fairly well, the logistic regression model  
332 performs best (AUC:  $0.90\pm 0.03$ ), and evolutionary statistical energies alone (AUC:  $0.88\pm 0.03$ ) are  
333 slightly better at distinguishing disease-linked missense variants from harmless variants than REVEL  
334 (AUC:  $0.83\pm 0.03$ ), PolyPhen2 (AUC:  $0.84\pm 0.03$ ) and PROVEAN (AUC:  $0.76\pm 0.04$ ). Structure-  
335 based  $\Delta\Delta G$  calculations show similar performance to these sequence-based predictors (AUC:  
336  $0.82\pm 0.04$ ), but, as the shape of the ROC curve illustrates, are particularly informative in the region  
337 of high specificity.

338 Lastly, we assessed whether the underlying genomic changes could affect splicing and thus have  
339 pathogenic potential, rather than directly acting on the protein level. Using SpliceAI (Jaganathan et  
340 al., 2019) (REF) we predicted that 19/116 (16%) of the ClinVar variants may affect splicing. All 19  
341 are pathogenic variants; no benign variants were predicted to affect splicing. Interestingly, 4 of these  
342 variants are in have scores in our regression model that suggest them to be non-detrimental, and thus

343 predicted not to affect protein function or stability (Fig. 6G). Thus, more than half (4/7) of these  
344 erroneously classified variants may affect splicing rather than protein function, a substantially higher  
345 fraction than the 17% (15/88) that are predicted to affect splicing among those variants that are  
346 correctly classified by our regression model integrating  $\Delta\Delta G$  and evolutionary sequence energies.  
347 The overall fraction predicted to affect splicing is similar to that reported in a recent genome-editing-  
348 based study on BRCA1 variants (Findlay et al., 2018).

349



## 350 Discussion

351 Missense variants in the *MLH1* gene are a leading cause of Lynch syndrome (LS) and colorectal  
352 cancer (Peltomaki, 2016). In recent years, germline mutations that cause structural destabilization and  
353 subsequent protein misfolding have surfaced as the cause of several diseases, including cystic fibrosis  
354 (Ahner et al., 2007), phenylketonuria (Pey et al., 2007; Scheller et al., 2019), early onset Parkinson's  
355 disease (Mathiasen et al., 2015; Olzmann et al., 2004) and MSH2-linked LS (Arlow et al., 2013;  
356 Nielsen et al., 2017). Although previous studies have shown some MLH1 variants to be destabilized  
357 (Takahashi et al., 2007; Perera & Bapat, 2008), this has not been systematically addressed and the  
358 contribution of MLH1 protein stability for LS remains to be resolved.

359 In this study, we performed *in silico* saturation mutagenesis and stability predictions of all single-site  
360 MLH1 missense variants in the structurally-resolved regions of MLH1. Comparisons with a selected  
361 group of naturally occurring MLH1 variants revealed that those variants that are predicted to be  
362 destabilized indeed display substantially reduced steady-state protein levels. The decreased cellular  
363 amounts are caused by rapid proteasomal degradation. In turn, the loss of MLH1 causes a dramatic  
364 destabilization and proteasomal degradation of both PMS1 and PMS2. This effect suggests that the  
365 MutL $\alpha$  and MutL $\beta$  heterodimers are likely to be rather stable protein complexes, as the PMS1 and  
366 PMS2 proteins would otherwise be required to be stable in the absence of MLH1. These observations  
367 are in line with several previous studies on individual MLH1 variants (Cravo et al., 2002; Kosinski  
368 et al., 2010; Perera & Bapat, 2008; Raevaara et al., 2005) including a thorough analysis by Takahashi  
369 *et al.* (Takahashi et al., 2007), and also agree with tissue staining of tumor cells from patients with  
370 germline *MLH1* mutations (Hampel et al., 2008; de Jong et al., 2004).

371 Our observation that single amino acid changes in MLH1 are sufficient to cause degradation is similar  
372 to results from multiple other proteins including recent deep mutational scans on PTEN and TPMT  
373 (Matreyek et al., 2018), our previous results on MSH2 in human cells (Nielsen et al., 2017), and

374 earlier observations on Lynch syndrome MSH2 variants in yeast (Gammie et al., 2007; Arlow et al.,  
375 2013). Our structural stability calculations predict that a relatively mild destabilization of just a few  
376 (~3 kcal/mol) is sufficient to trigger MLH1 degradation, an observation in line with previous studies  
377 on other proteins (Bullock et al., 2000; Nielsen et al., 2017; Suri et al., 2017; Scheller et al., 2019;  
378 Jepsen et al., 2019; Caswell et al., 2019). Although the absolute thermodynamic stability of MLH1 is  
379 unknown, both *in vitro* and in a cellular context, it is possible that the 3 kcal/mol destabilization  
380 necessary to trigger degradation is lower than that required to reach the fully unfolded state. Although  
381 we show that wild-type MLH1 is perhaps only marginally stable, we propose that these effects of  
382 slightly destabilizing amino acid substitutions could be the result of local unfolding events rather than  
383 a global unfolding. Accordingly, it appears that the PQC system is tightly tuned to detect increased  
384 amounts of minor or transient structural defects, which is supported by observations on MSH2  
385 showing that in some cases the destabilized variants are even functional when degradation is blocked  
386 (Arlow et al., 2013), and results showing that the PQC system preferably targets folding intermediates  
387 (Bershtein et al., 2013). As a result, it is surprising that predictions of changes to the global folding  
388 stability (using the fully unfolded state as a reference) are so effective in distinguishing variants that  
389 are stable in the cell from those that are more rapidly degraded. These observations also suggest that  
390 improved understanding of the biophysical basis for cellular quality control might lead to even better  
391 predictions of cellular abundance.

392 In our cellular studies, the MLH1 variants were expressed from a constitutive promoter, thus  
393 bypassing any potential transcriptional regulation of MLH1 expression involving, for example,  
394 amounts of the MLH1 protein or its function. Hence, in other experimental setups where MLH1  
395 variants are generated at the endogenous locus, additional layers of control may affect the observed  
396 correlation between structural stability and steady-state amounts. Another main difference between  
397 the cellular context and the predicted stability is the multiple roles played by the PQC system. For

398 example, on one hand, chaperones may aid in folding or stabilizing proteins, but may at the same  
399 time act as sensors of misfolded proteins and help target them for degradation. Increased amounts of  
400 unfolded or misfolded proteins may affect and titrate PQC components, thus complicating the  
401 relationship between protein stability and abundance. Nevertheless, since the predicted protein  
402 stabilities can, to a large extent, discriminate between pathogenic and benign variants, we expect that  
403 multiple disease-linked *MLH1* variants will indeed display reduced cellular levels.

404 Similar to our previous observations for *MSH2* (Nielsen et al., 2017), these results indicate that  
405 structural destabilization appears to be a common result of many disease-linked *MLH1* missense  
406 variants. Supported by earlier functional studies (Takahashi et al., 2007), we suggest that the loss-of-  
407 function phenotype in many cases can be explained by structural destabilization and subsequent  
408 degradation. Indeed, 20 out of the 31 variants with DME=0 or DME=1 have steady-state levels less  
409 than 70% of wildtype *MLH1*. Our data also include examples of loss-of-function variants with high  
410 steady-state levels, which is expected, as variants can affect function without modifying stability, e.g.  
411 by changing binding interfaces or active sites (Gueneau et al., 2013), and these would therefore be  
412 interesting to analyze biochemically in more detail. For example, M35R, N64S and F80V are all close  
413 to the ATP binding site in the N-terminal domain of *MLH1* (Fig. 6, figure supplement 2), and might  
414 thus interfere with the catalytic activity. This would be consistent with a loss-of-function phenotype  
415 (Takahashi et al., 2007) but wild-type-like cellular protein levels (Table 1).

416 The correlation between the predicted structural stability with both cellular stability and protein  
417 function, suggests that the stability predictions may be used for classifying *MLH1* missense variants.  
418 This is particularly relevant for LS, where according to the ClinVar database (Landrum et al., 2018)  
419 711 out of 851 (~84%) reported *MLH1* missense variants are assigned as so-called variants of  
420 uncertain significance (VUS) (Manolio et al., 2017). Of note, the fact that we did not observe the  
421 E23D VUS as destabilized does not preclude this variant from being pathogenic, since it may affect

422 function without being structurally perturbed. Although the variant appears functional in yeast cells  
423 (Takahashi et al., 2007), the evolutionary statistical energy of 0.9 indicates that this change is rare  
424 across the MLH1 protein family evolution and thus might be detrimental. Our results for the K618A  
425 VUS suggest that this variant, albeit being unstable, is still able to associate with PMS2 and may  
426 therefore be functional, but untimely degraded. Of the 69 MLH1 variants that we analyzed, 30 have  
427 status as VUSs. Of these, our analysis identified several (e.g. G54E, G244V, and L676R) that hold  
428 characteristics indicating that they are pathogenic: steady-state levels below 50% of WT, high  $\Delta\Delta G$   
429 and low functionality score *in vivo* (Takahashi et al., 2007) (Table 1).

430 The potential use of stability predictions for LS diagnostics is supported by the predicted MLH1  
431 stabilities clearly separating into disease-linked and benign MLH1 variants. Moreover, since we  
432 observe that those MLH1 alleles that occur more frequently in the population are in general predicted  
433 as stable, this suggests that these common MLH1 alleles are either benign or at least only disease  
434 causing with a low penetrance. However, certainly not all the unstable variants were accurately  
435 detected by the structural predictions. For instance, out of our eight selected variants, three (R100P,  
436 R265C, K618A) appeared unstable, but were not predicted to be so (Table 1). As described above, it  
437 is important to note that the stability predictions report on the global stability of the protein, while in  
438 a cellular context it is unlikely that any of the variants are fully unfolded. Instead, it is likely that local  
439 elements unfold (Stein et al., 2019), and although refolding may occur, the locally unfolded state  
440 allows chaperones and other protein quality control components to associate and target the protein  
441 for proteasomal degradation (Fig. 7). A better understanding of the importance of local unfolding  
442 events for cellular stability is an important area for further research. Indeed, in addition to the utility  
443 for classifying potential LS variants, we believe that an important aspect of our work is that it suggests  
444 a single mechanistic origin of ~60% of the LS MLH1 variants that we have studied. This observation  
445 is also supported by our ROC analysis (Fig. 6D), which demonstrates that the stability calculations

446 can identify ~60% of the pathogenic variants at very high specificity (few false positives) exactly  
447 because these are the variants that appear to cause disease via this mechanism. The ability to  
448 separately analyze effects on protein stability and other effects that might be captured by the sequence  
449 analysis is also an advantage of applying the predictors individually, rather than relying on combined  
450 predictors such as our regression model or published ensemble-based meta-predictors. While those  
451 have slightly higher overall accuracy, they do not directly indicate the underlying molecular reason  
452 for pathogenicity. Incidentally, we note that by analyzing both calculations and multiplexed assays  
453 of variant effects, we recently found that ~60% of disease-causing variants in the protein PTEN were  
454 caused by destabilization and a resulting drop in cellular abundance (Jepsen et al., 2019). On the other  
455 hand, while stability prediction is very useful for accurate identification of many pathogenic variants,  
456 it may have lower overall sensitivity. We speculate that this is due to stability being a necessary, but  
457 not sufficient criterion, i.e., destabilized variants are likely pathogenic, while a variant being stable  
458 does not necessary imply it being functional.

459 Lastly, we predicted the effects variants with known consequences (benign or pathogenic) may have  
460 on splicing, which may also lead to pathogenic changes. We found that, overall, about 16% of the  
461 variants are predicted to affect splicing, though none of the 19 benign variants are in this category.  
462 Interestingly, 4/7 pathogenic variants in the region that the logistic regression model predicts to be  
463 benign may affect splicing (Fig. 6G), indicating that integration of effects on the genomic level are  
464 likely to boost overall predictive power, and should be considered in future developments of  
465 pathogenicity predictors.

466 In line with observations on other destabilized proteins, we found that the degradation of some  
467 structurally destabilized MLH1 variants depends on the molecular chaperone HSP70. This suggests  
468 that HSP70 recognizes the destabilized MLH1 variants and targets them for proteasomal degradation.  
469 Accordingly, we observed that several destabilized MLH1 variants associate with HSP70.

470 Involvement of molecular chaperones in protein degradation is a well-established phenomenon  
471 (Samant et al., 2018; Arndt et al., 2007; Kandasamy & Andreasson, 2018). Moreover, our findings  
472 are consistent with recent developments in the field, showing that degradation signals, so-called  
473 degrons, are buried within the native structure of most globular proteins. Upon exposure when the  
474 protein structure is destabilized, the degrons are recognized by chaperones and other protein quality  
475 control components, which in turn guide the target protein for degradation (Enam et al., 2018; Geffen  
476 et al., 2016; Kim et al., 2013; Maurer et al., 2016; Ravid & Hochstrasser, 2008). Thus, ultimately the  
477 degradation of a protein will depend on both the structural destabilization ( $\Delta\Delta G$ ) as well as the  
478 exposed degrons, and how efficiently these are recognized by the degradation machinery. The results  
479 presented here suggest that biophysical calculations are able to predict the structural destabilization  
480 ( $\Delta\Delta G$ ), however, since the nature of protein quality control degrons is still largely undefined (Geffen  
481 et al., 2016; Maurer et al., 2016; Rosenbaum et al., 2011; van der Lee et al., 2014), *in silico* prediction  
482 of these is currently not possible.

483 In conclusion, our results support a model (Fig. 7) where missense mutations can cause destabilization  
484 of the MLH1 protein, leading to exposure of degrons which, in turn, trigger HSP70-assisted  
485 proteasomal degradation, causing disruption of the MMR pathway and ultimately leading to an  
486 increased cumulative lifetime risk of cancer development in LS patients. Potentially, this opens up  
487 for new therapeutic approaches, including inhibiting the PQC-mediated clearance of marginally  
488 stable MLH1 variants, or small molecule stabilizers of MLH1.

489

490 **Materials and Methods**

491

| <b>Key Resources Table</b>                |                                         |                            |                              |                                     |
|-------------------------------------------|-----------------------------------------|----------------------------|------------------------------|-------------------------------------|
| <b>Reagent type (species) or resource</b> | <b>Designation</b>                      | <b>Source or reference</b> | <b>Identifiers</b>           | <b>Additional information</b>       |
| gene ( <i>Homo sapiens</i> )              | <i>MLH1</i>                             | -                          | UniProt identifier: P40692-1 | -                                   |
| cell line ( <i>Homo sapiens</i> )         | HCT116                                  | ATCC                       | CCL-247EMT                   | -                                   |
| antibody                                  | anti-MLH1 (rabbit polyclonal)           | Santa Cruz Biotechnology   | sc-11442                     | Dilution: 1:100 (IF)<br>1:1000 (WB) |
| antibody                                  | anti- $\beta$ -actin (mouse monoclonal) | Sigma-Aldrich              | A5441                        | Dilution: 1:20000                   |
| antibody                                  | anti-PMS2 (mouse monoclonal)            | BD Biosciences             | 556415                       | Dilution: 1:2500                    |
| antibody                                  | anti-PMS1 (rabbit polyclonal)           | Invitrogen                 | PA5-35952                    | Dilution: 1:2500                    |
| antibody                                  | anti-GFP (rat monoclonal)               | ChromoTek                  | 3H9                          | Dilution: 1:2000                    |
| antibody                                  | anti-myc (rat monoclonal)               | ChromoTek                  | 9E1                          | Dilution: 1:1000                    |

|                         |                                 |                             |                          |                                               |
|-------------------------|---------------------------------|-----------------------------|--------------------------|-----------------------------------------------|
| antibody                | anti-HA (rat monoclonal)        | Roche                       | 3F10                     | Dilution:<br>1:2000                           |
| antibody                | anti-GAPDH (rabbit monoclonal)  | Cell Signaling Technologies | 14C10                    | Dilution:<br>1:2000                           |
| antibody                | anti-PMCA (mouse monoclonal)    | Invitrogen                  | MA3-914                  | Dilution:<br>1:2000                           |
| recombinant DNA reagent | pCMV6-MYC-DDK-HSP70-1A (HSPA1A) | OriGene                     | RC200270                 | -                                             |
| recombinant DNA reagent | pcDNA3-HA-HSP90                 | Addgene                     | 22487                    | -                                             |
| recombinant DNA reagent | pEYFP-C2-PMS2                   | Prof. Lene J. Rasmussen     | (Andersen et al., 2012)  | -                                             |
| recombinant DNA reagent | pEGFP-C1                        | Clontech                    | Discontinued by supplier | Available from NovoPro Labs (Cat. No. V12024) |
| recombinant DNA reagent | pcDNA3.1-V5-His                 | Invitrogen                  | V81020                   | -                                             |
| recombinant DNA reagent | pCMV-MLH1 & MLH1 variants       | Prof. Chikashi Ishioka      | (Takahashi et al., 2007) | -                                             |
| commercial assay or kit | FuGENE HD                       | Promega                     | E2311                    | -                                             |



|                         |                 |                                                                                         |              |                     |
|-------------------------|-----------------|-----------------------------------------------------------------------------------------|--------------|---------------------|
| chemical compound, drug | Bortezomib      | LC Laboratories                                                                         | B-1408       | -                   |
| chemical compound, drug | YM01            | StressMarq                                                                              | SIH-121      | -                   |
| chemical compound, drug | Geldanamycin    | Sigma-Aldrich                                                                           | G3381        | -                   |
| chemical compound, drug | Cycloheximide   | Sigma-Aldrich                                                                           | C1988        | -                   |
| software, algorithm     | UnScanIt gel    | Silk Scientific                                                                         | V6.1         | -                   |
| software, algorithm     | FoldX           | <a href="http://foldxsuite.crg.eu/">http://foldxsuite.crg.eu/</a>                       | January 2017 | Details see Methods |
| software, algorithm     | Gremlin         | <a href="https://github.com/sokrypton/GREMLIN">https://github.com/sokrypton/GREMLIN</a> | V2.01        | Details see Methods |
| software, algorithm     | Custom R script | -                                                                                       | -            | -                   |
| software, algorithm     | SpliceAI        | <a href="https://github.com/Illumina/SpliceAI">https://github.com/Illumina/SpliceAI</a> | V1.2.1       | -                   |

492

493 *Plasmids*

494 Plasmids for expression of wild-type and mutant MLH1 variants have been described before  
 495 (Takahashi et al., 2007). pCMV-MYC-DDK-HSP70 and pcDNA3-HA-HSP90 were kindly provided  
 496 by Dr. Kenneth Thirstrup (H. Lundbeck A/S). The pEYFP-C2-PMS2 plasmid was kindly provided  
 497 by Prof. Lene J. Rasmussen (University of Copenhagen). pEGFP was purchased from Clontech. A  
 498 pcDNA3-V5 vector served as a negative control.

499

500 *Cell culture*

501 HCT116 cells (kindly provided by Prof. Mads Gyrd-Hansen (University of Oxford)) were maintained  
502 in McCoy's 5A medium (Gibco) supplemented with 10% fetal calf serum (Invitrogen), 2 mM  
503 glutamine, 5000 IU/ml penicillin and 5 mg/ml streptomycin at 37 °C in a humidified atmosphere with  
504 5% CO<sub>2</sub>. Cell line authentication by STR analysis was performed by Eurofins. The cells were not  
505 contaminated by mycoplasma.

506 Transfections were performed using FugeneHD (Promega) as described by the manufacturer in  
507 reduced serum medium OptiMEM (Gibco). Cells were harvested no later than 72 hours after  
508 transfection at a final confluence around 90%. About 24 hours after transfection, cells were treated  
509 with serum-free growth medium containing 25 µg/mL cycloheximide (Sigma) for a duration of 4, 8  
510 or 12 hours, 10 µM bortezomib (LC laboratories) for 8 or 16 hours, 5 µM YM01 (StressMarq) for 24  
511 hours or 1 µM geldanamycin (Sigma) for 24 hours. Cells were lysed in SDS sample buffer (94 mM  
512 Tris/HCl pH 6.8, 3% SDS, 19% glycerol and 0.75% β-mercaptoethanol) and protein levels were  
513 analyzed by SDS-PAGE and Western blotting.

514

515 *SDS-PAGE and Western blotting*

516 Proteins were resolved by SDS-PAGE on 7x8 cm 12.5% acrylamide gels, and transferred to 0.2 µm  
517 nitrocellulose membranes (Advantec, Toyo Roshi Kaisha Ltd.). Blocking was performed using PBS  
518 (8 g/L NaCl, 0.2 g/L KCl, 1.44 g/L Na<sub>2</sub>HPO<sub>4</sub>, 0.24 g/L KH<sub>2</sub>PO<sub>4</sub>, pH 7.4) with 5% dry milk powder  
519 and 0.05% Tween-20. Membranes were probed with primary antibodies (see Key Resources Table)  
520 at 4 °C overnight. HRP-conjugated secondary antibodies were purchased from DAKO. ECL detection  
521 reagent (GE Life Sciences) was used for development.

522

523 *Immunofluorescence and imaging*

524 Transfected cells were seeded 24 hours prior to fixing with 4 % formaldehyde in PBS in thin-  
525 bottomed 384-well plates. The fixed cells were then washed three times in PBS and permeabilized  
526 with 0.25 % Triton-X-100 in PBS for 5 minutes at room temperature (RT). After washing with PBS,  
527 5 % bovine serum albumin (BSA, Sigma) in PBS was used for 45 minutes at RT for blocking. The  
528 cells were then washed with PBS and incubated with a 1:100 dilution of the anti-MLH1 antibody  
529 (Santa Cruz Biotechnology, Product no.: sc-11442) in 1 % BSA in PBS for 1 hour at RT. The cells  
530 were washed with PBS and incubated with a 1:1000 dilution Alexa Fluor 568 anti-rabbit antibody  
531 (Invitrogen) in 1 % BSA in PBS for 1 hour at RT. After additional washing with PBS, the DNA was  
532 stained with Höchst 33342 (Sigma) for 10 minutes. Microscopy was performed using an InCell2200  
533 microscope (GE Healthcare). The filters were Höchst (ex 390 nm, em 432 nm) and TexasRed (ex 575  
534 nm, em 620 nm). The InCell Developer Toolbox (GE Healthcare) was used for image analysis. To  
535 determine the abundance of the MLH1 variants, the total intensity of the red channel in each cell was  
536 measured after excluding the non-transfected cells.

537

538 *Co-immunoprecipitation*

539 Transfected cells were lysed in buffer A (50 mM Tris/HCl pH 7.5, 150 mM NaCl, 1 mM EDTA and  
540 0.5% NP-40 supplemented with Complete Mini EDTA-free Protease inhibitor cocktail tablets  
541 (Roche)) and left to incubate for 20 minutes on ice. The lysates were cleared by centrifugation (13000  
542 g, 30 min) and the proteins were captured with GFP-trap (Chromotek), Myc-trap (Chromotek) or HA-  
543 agarose beads (Sigma) by tumbling end-over-end overnight at 4 °C. The beads were washed three  
544 times by centrifugation (1000 g, 10 sec) in buffer A. Finally, the beads were resuspended in SDS  
545 sample buffer (94 mM Tris/HCl pH 6.8, 3% SDS, 19% glycerol and 0.75%  $\beta$ -mercaptoethanol) and  
546 analyzed by SDS-PAGE and Western blotting.

547

548 *Solubility assays*

549 For analyses of wild-type MLH1, HCT116 cells were transfected as described above. Cells were  
550 harvested in buffer B (50 mM Tris/HCl pH 7.5, 150 mM NaCl, 1 mM EDTA) supplemented with  
551 complete protease inhibitor cocktail tablets (Roche), and lysed by sonication (3 x 10 sec). Then the  
552 lysate was distributed into different tubes that were incubated at 30 min. at the indicated temperatures.  
553 The soluble and insoluble fractions were separated by centrifugation (15000 g, 4 °C, 30 min), after  
554 which the supernatant was removed and the pellet washed once in buffer B. Subsequently, SDS  
555 sample buffer was added, and the final sample volume was kept identical between the pellet and the  
556 supernatant. Finally, fractions were analyzed by SDS-PAGE and Western blotting as described.

557 For comparison of the variants, HCT116 cells were transfected and treated with bortezomib as  
558 described above. Cells were harvested in buffer B supplemented with complete protease inhibitor  
559 cocktail tablets (Roche), and lysed by sonication (3 x 10 sec). The soluble and insoluble fractions  
560 were then immediately separated by centrifugation and analyzed SDS-PAGE and Western blotting  
561 as described above.

562

563 *Stability calculations*

564 The changes in folding stability ( $\Delta\Delta G$ ) were calculated using FoldX (Guerois et al., 2002) based on  
565 PDB IDs 4P7A (Wu et al., 2015) for the N-terminal domain of MLH1, and 3RBN for the C-terminal  
566 domain. The  $\Delta\Delta G$ s were calculated from each structure individually by first applying the RepairPDB  
567 function to fix minor issues in the original coordinates, and then the BuildModel function to generate  
568 each individual amino acid variant. Each calculation was repeated 5 times, and the average difference  
569 in stability between wild type and variant is reported, such that values  $<0$  kcal/mol indicate stabilized  
570 variants, and values  $>0$  kcal/mol indicate destabilized variants with respect to the wild type MLH1

571 protein. Values > 15 kcal/mol likely indicate clashes in the model FoldX generated. While this does  
572 indicate that major destabilization is likely, the actual values are less meaningful for these clashing  
573 variants, and we thus truncated them to 15 kcal/mol in our figures.

574

#### 575 *Evolutionary statistical energy calculations*

576 To assess the likelihood of finding any given variant in the protein family, we created a multiple  
577 sequence alignment of human MLH1 using HHblits (Zimmermann et al., 2018) and then calculated  
578 a sequence log-likelihood score combining site-conservation and pairwise co-variation using Gremlin  
579 (Balakrishnan et al., 2011). Scores were normalized to a range of (0,1), with low scores indicating  
580 tolerated sequences and high scores indicating variants that are rare or unobserved across the multiple  
581 sequence alignment. Positions at which the number of distinct homologous sequences was too small  
582 to extract meaningful evolutionary statistical energies are set to NA (supplemental material file 2).  
583 Other sequence-based predictions of functional variant consequences were retrieved from the  
584 webservers of PROVEAN (Choi & Chan, 2015) and PolyPhen2 (Adzhubei et al., 2010), and extracted  
585 from the pre-calculated scores for REVEL (Ioannidis et al., 2016).

586

#### 587 *Dominant mutator effect (DME)*

588 We grouped the functional classification observations from Takahashi *et al.* (Takahashi et al., 2007)  
589 into 4 categories by summarizing the number of assays each variant showed functional behavior in.  
590 Thus, variants in group 0 were non-functional in all three assays, those in group 3 were functional in  
591 all three assays, and the rest were functional in some, but not in other assays.

592

593 **Acknowledgements**

594 The authors thank Prof. Lene J. Rasmussen, Prof. Mads Gyrd-Hansen, and Dr. Kenneth Thirstrup for  
595 sharing cells and reagents, and Dr. Elin J. Pietras, Dr. Cornelia Steinhauer, Cecilie Søtoft, Anne-  
596 Marie Lauridsen, and the Core Facility for Integrated Microscopy for excellent technical assistance.

597

598 **Competing interests**

599 No competing interests declared.

600

601 **Author contributions**

602 A.B.A., A.S., S.V.N., K.S.K., E.P., and A.Sh. conducted the experiments. A.B.A., A.S., S.V.N., M.T.,  
603 C.I., K.L.-L. and R.H.-P. analyzed the data. A.B.A., A.S., K.L.-L. and R.H.-P. designed the  
604 experiments. E.R.H., I.B., A.-M.G., K.L.-L. and R.H.-P. conceived the study. M.T. and C.I.  
605 contributed reagents. A.B.A, A.S., K.L.-L. and R.H.-P. wrote the paper.

606

607 **Funding**

608 This work was supported by grants from the Novo Nordisk Foundation Challenge Program PRISM  
609 (to A.S., K.L.-L., and R.H.-P.), the Lundbeck Foundation (to A.S., K.L.-L., and R.H.-P.), the Danish  
610 Cancer Society (to R.H.-P.), the A.P. Møller Foundation (to R.H.-P.), Novo Nordisk Foundation  
611 Young Investigator Award (NNF15OC0016662; to E.R.H.) and Hallas-Møller programme (to K.L.-  
612 L.) and the Danish Council for Independent Research (to R.H.-P).

613

**Table 1**  
*Characteristics of the selected naturally occurring MLH1 variants*

| <b>Variant*</b> | <b>Steady-state level (% of WT)</b> | <b>FoldX <math>\Delta\Delta G</math> (kcal/mol)</b> | <b>ClinVar annotation<sup>□</sup></b> | <b>DME<sup>#</sup></b> |
|-----------------|-------------------------------------|-----------------------------------------------------|---------------------------------------|------------------------|
| <b>E23D</b>     | <b>90.0</b>                         | <b>0.49</b>                                         | <b>VUS</b>                            | <b>3</b>               |
| I25T            | 51.3                                | 2.40                                                | VUS                                   | 3                      |
| A29S            | 109.6                               | 2.06                                                | (likely) pathogenic                   | 3                      |
| M35R            | 72.1                                | 3.52                                                | (likely) pathogenic                   | 0                      |
| I36S            | 63.2                                | 4.08                                                | VUS                                   | NA                     |
| N38D            | 63.5                                | 1.61                                                | VUS                                   | 2                      |
| S44F            | 9.8                                 | >15                                                 | (likely) pathogenic                   | 0                      |
| S44A            | 103.2                               | -1.35                                               | VUS                                   | 3                      |
| G54E            | 15.3                                | >15                                                 | VUS                                   | 1                      |
| N64S            | 96.3                                | 2.16                                                | VUS                                   | 1                      |
| <b>G67R</b>     | <b>35.0</b>                         | <b>&gt;15</b>                                       | <b>(likely) pathogenic</b>            | <b>0</b>               |
| G67W            | 14.5                                | >15                                                 | (likely) pathogenic                   | 0                      |
| I68N            | 62.5                                | 2.22                                                | (likely) pathogenic                   | 0                      |
| R69K            | 104.9                               | -0.18                                               | VUS                                   | 3                      |
| C77Y            | 61.0                                | 6.57                                                | (likely) pathogenic                   | 2                      |
| F80V            | 72.3                                | 2.22                                                | (likely) pathogenic                   | 1                      |
| T82I            | 100.0                               | 0.54                                                | (likely) pathogenic                   | 2                      |
| <b>R100P</b>    | <b>46.4</b>                         | <b>-1.25</b>                                        | <b>(likely) pathogenic</b>            | <b>2</b>               |
| E102D           | 97.9                                | 0.34                                                | (likely) pathogenic                   | 3                      |
| A111V           | 68.8                                | 4.96                                                | (likely) pathogenic                   | 0                      |
| <b>T117M</b>    | <b>32.8</b>                         | <b>7.14</b>                                         | <b>(likely) pathogenic</b>            | <b>0</b>               |
| T117R           | 46.2                                | 12.70                                               | (likely) pathogenic                   | 0                      |
| A128P           | 62.8                                | 2.40                                                | (likely) pathogenic                   | 0                      |
| D132H           | 110.2                               | -0.30                                               | (likely) benign                       | 3                      |
| A160V           | 107.3                               | 0.38                                                | VUS                                   | 3                      |
| R182G           | 87.9                                | 2.60                                                | (likely) pathogenic                   | 3                      |
| S193P           | 100.7                               | 2.73                                                | VUS                                   | 0                      |
| V213M           | 103.9                               | -0.81                                               | (likely) benign                       | 3                      |
| R217C           | 74.1                                | 1.06                                                | VUS                                   | 2                      |
| <b>I219V</b>    | <b>112.5</b>                        | <b>0.66</b>                                         | <b>(likely) benign</b>                | <b>3</b>               |
| I219L           | 121.9                               | -0.05                                               | (likely) benign                       | 3                      |
| R226L           | 63.3                                | 0.27                                                | (likely) pathogenic                   | 1                      |
| G244V           | 32.0                                | >15                                                 | VUS                                   | 0                      |
| G244D           | 38.8                                | >15                                                 | (likely) pathogenic                   | 0                      |
| H264R           | 117.6                               | -0.60                                               | VUS                                   | 3                      |
| <b>R265C</b>    | <b>57.2</b>                         | <b>0.28</b>                                         | <b>(likely) pathogenic</b>            | <b>2</b>               |
| R265H           | 81.4                                | 0.04                                                | VUS                                   | 3                      |
| E268G           | 81.1                                | 0.81                                                | (likely) benign                       | 2                      |
| L272V           | 80.0                                | 1.95                                                | VUS                                   | 3                      |
| A281V           | 82.5                                | 0.87                                                | (likely) pathogenic                   | 3                      |
| K286Q           | 101.8                               | 0.28                                                | VUS                                   | 2                      |
| S295G           | 88.6                                | 0.13                                                | (likely) pathogenic                   | 2                      |
| H329P           | 54.1                                | 5.67                                                | (likely) pathogenic                   | 1                      |
| V506A           | 62.1                                | 2.18                                                | VUS                                   | 2                      |
| Q542L           | 110.2                               | -1.56                                               | VUS                                   | 3                      |
| L549P           | 63.7                                | 5.17                                                | VUS                                   | 0                      |
| I565F           | 65.9                                | 9.64                                                | VUS                                   | 0                      |
| L574P           | 34.4                                | 11.97                                               | (likely) pathogenic                   | 0                      |
| E578G           | 103.2                               | 0.45                                                | (likely) benign                       | 2                      |
| L582V           | 100.0                               | 1.93                                                | VUS                                   | 3                      |
| L588P           | 88.6                                | 3.30                                                | VUS                                   | 1                      |
| <b>K618A</b>    | <b>80.4</b>                         | <b>0.61</b>                                         | <b>VUS</b>                            | <b>1</b>               |
| K618T           | 106.5                               | 0.09                                                | (likely) benign                       | 0                      |
| L622H           | 61.1                                | 4.97                                                | (likely) pathogenic                   | 0                      |
| P640T           | 61.1                                | 3.78                                                | VUS                                   | 0                      |

|              |             |             |                            |          |
|--------------|-------------|-------------|----------------------------|----------|
| L653R        | 66.1        | 3.22        | (likely) pathogenic        | 0        |
| I655V        | 89.1        | 1.03        | (likely) benign            | 3        |
| I655T        | 71.1        | 1.29        | VUS                        | 3        |
| <b>R659P</b> | <b>69.0</b> | <b>6.93</b> | <b>(likely) pathogenic</b> | <b>0</b> |
| R659Q        | 84.9        | 2.41        | VUS                        | 2        |
| T662P        | 72.7        | 5.23        | (likely) pathogenic        | 0        |
| E663G        | 72.0        | -0.23       | VUS                        | 3        |
| E663D        | 97.2        | 0.66        | (likely) pathogenic        | 2        |
| L676R        | 36.8        | 5.12        | VUS                        | 0        |
| R687W        | 115.4       | 1.12        | (likely) pathogenic        | 0        |
| Q689R        | 71.0        | -0.54       | (likely) benign            | 3        |
| V716M        | 100.1       | 1.41        | (likely) benign            | 1        |
| H718Y        | 73.7        | 0.16        | (likely) benign            | 2        |
| K751R        | 82.1        | -0.23       | (likely) benign            | 3        |

614 \*: boldfaced variants studied in detail; □: VUS: variant of unknown significance; #DME: dominant mutator effect

615

616

617



618 **References**

619

620 Aarnio, M., Sankila, R., Pukkala, E., Salovaara, R., Aaltonen, L. A., de la Chapelle, A., Peltomaki,  
621 P., Mecklin, J. P., & Jarvinen, H. J. (1999). Cancer risk in mutation carriers of DNA-  
622 mismatch-repair genes. *Int.J.Cancer*, *81*, 214-218.

623 Adzhubei, I. A., Schmidt, S., Peshkin, L., Ramensky, V. E., Gerasimova, A., Bork, P., Kondrashov,  
624 A. S., & Sunyaev, S. R. (2010). A method and server for predicting damaging missense  
625 mutations. *Nat.Methods*, *7*, 248-249.

626 Ahner, A., Nakatsukasa, K., Zhang, H., Frizzell, R. A., & Brodsky, J. L. (2007). Small heat-shock  
627 proteins select deltaF508-CFTR for endoplasmic reticulum-associated degradation.  
628 *Mol.Biol.Cell*, *18*, 806-814.

629 Allen, M., Poggiali, D., Whitaker, K., Marshall, T. R., & Kievit, R. (2018). Raincloud plots: a multi-  
630 platform tool for robust data visualization. *PeerJ Preprints*, *6*, e27137v1.

631 Andersen, S. D., Liberti, S. E., Lutzen, A., Drost, M., Bernstein, I., Nilbert, M., Dominguez, M.,  
632 Nystrom, M., Hansen, T. V., Christoffersen, J. W., Jager, A. C., de, W. N., Nielsen, F. C.,  
633 Topping, P. M., & Rasmussen, L. J. (2012). Functional characterization of MLH1 missense  
634 variants identified in Lynch syndrome patients. *Hum.Mutat.*, *33*, 1647-1655.

635 Arlow, T., Scott, K., Wagenseller, A., & Gammie, A. (2013). Proteasome inhibition rescues clinically  
636 significant unstable variants of the mismatch repair protein Msh2. *Proc.Natl.Acad.Sci.U.S.A*,  
637 *110*, 246-251.

638 Arndt, V., Rogon, C., & Hohfeld, J. (2007). To be, or not to be--molecular chaperones in protein  
639 degradation. *Cell Mol.Life Sci.*, *64*, 2525-2541.

640 Balakrishnan, S., Kamisetty, H., Carbonell, J. G., Lee, S. I., & Langmead, C. J. (2011). Learning  
641 generative models for protein fold families. *Proteins*, *79*, 1061-1078.

642 Barrow, E., Alduaij, W., Robinson, L., Shenton, A., Clancy, T., Lalloo, F., Hill, J., & Evans, D. G.  
643 (2008). Colorectal cancer in HNPCC: cumulative lifetime incidence, survival and tumour  
644 distribution. A report of 121 families with proven mutations. *Clin.Genet.*, *74*, 233-242.

645 Bershtein, S., Mu, W., Serohijos, A. W., Zhou, J., & Shakhnovich, E. I. (2013). Protein quality control  
646 acts on folding intermediates to shape the effects of mutations on organismal fitness. *Mol.Cell*,  
647 *49*, 133-144.

648 Bullock, A. N., Henckel, J., & Fersht, A. R. (2000). Quantitative analysis of residual folding and  
649 DNA binding in mutant p53 core domain: definition of mutant states for rescue in cancer  
650 therapy. *Oncogene*, *19*, 1245-1256.

- 651 Cannavo, E., Gerrits, B., Marra, G., Schlapbach, R., & Jiricny, J. (2007). Characterization of the  
652 interactome of the human MutL homologues MLH1, PMS1, and PMS2. *J.Biol.Chem.*, 282,  
653 2976-2986.
- 654 Casadio, R., Vassura, M., Tiwari, S., Fariselli, P., & Luigi, M. P. (2011). Correlating disease-related  
655 mutations to their effect on protein stability: a large-scale analysis of the human proteome.  
656 *Hum.Mutat.*, 32, 1161-1170.
- 657 Caswell, R. C., Owens, M. M., Gunning, A. C., Ellard, S., & Wright, C. F. (2019). Using structural  
658 analysis *in silico* to assess the impact of missense variants in MEN1. *bioRxiv*, 661512.
- 659 Choi, Y. & Chan, A. P. (2015). PROVEAN web server: a tool to predict the functional effect of amino  
660 acid substitutions and indels. *Bioinformatics.*, 31, 2745-2747.
- 661 Cravo, M., Afonso, A. J., Lage, P., Albuquerque, C., Maia, L., Lacerda, C., Fidalgo, P., Chaves, P.,  
662 Cruz, C., & Nobre-Leitao, C. (2002). Pathogenicity of missense and splice site mutations in  
663 hMSH2 and hMLH1 mismatch repair genes: implications for genetic testing. *Gut*, 50, 405-  
664 412.
- 665 de Jong, A. E., van, P. M., Hendriks, Y., Tops, C., Wijnen, J., Ausems, M. G., Meijers-Heijboer, H.,  
666 Wagner, A., van Os, T. A., Brocker-Vriends, A. H., Vasen, H. F., & Morreau, H. (2004).  
667 Microsatellite instability, immunohistochemistry, and additional PMS2 staining in suspected  
668 hereditary nonpolyposis colorectal cancer. *Clin.Cancer Res.*, 10, 972-980.
- 669 Dowty, J. G., Win, A. K., Buchanan, D. D., Lindor, N. M., Macrae, F. A., Clendenning, M., Antill,  
670 Y. C., Thibodeau, S. N., Casey, G., Gallinger, S., Marchand, L. L., Newcomb, P. A., Haile,  
671 R. W., Young, G. P., James, P. A., Giles, G. G., Gunawardena, S. R., Leggett, B. A., Gattas,  
672 M., Boussioutas, A., Ahnen, D. J., Baron, J. A., Parry, S., Goldblatt, J., Young, J. P., Hopper,  
673 J. L., & Jenkins, M. A. (2013). Cancer risks for MLH1 and MSH2 mutation carriers.  
674 *Hum.Mutat.*, 34, 490-497.
- 675 Dunlop, M. G., Farrington, S. M., Carothers, A. D., Wyllie, A. H., Sharp, L., Burn, J., Liu, B., Kinzler,  
676 K. W., & Vogelstein, B. (1997). Cancer risk associated with germline DNA mismatch repair  
677 gene mutations. *Hum.Mol.Genet.*, 6, 105-110.
- 678 Enam, C., Geffen, Y., Ravid, T., & Gardner, R. G. (2018). Protein Quality Control Degradation in  
679 the Nucleus. *Annu.Rev.Biochem.*, 87, 725-749.
- 680 Fedier, A., Stuedli, A., & Fink, D. (2005). Presence of MLH1 protein aggravates the potential of the  
681 HSP90 inhibitor radicicol to sensitize tumor cells to cisplatin. *Int.J.Oncol.*, 27, 1697-1705.
- 682 Findlay, G. M., Daza, R. M., Martin, B., Zhang, M. D., Leith, A. P., Gasperini, M., Janizek, J. D.,  
683 Huang, X., Starita, L. M., & Shendure, J. (2018). Accurate classification of BRCA1 variants  
684 with saturation genome editing. *Nature*, 562, 217-222.

- 685 Gammie, A. E., Erdeniz, N., Beaver, J., Devlin, B., Nanji, A., & Rose, M. D. (2007). Functional  
686 characterization of pathogenic human MSH2 missense mutations in *Saccharomyces*  
687 *cerevisiae*. *Genetics*, *177*, 707-721.
- 688 Geffen, Y., Appleboim, A., Gardner, R. G., Friedman, N., Sadeh, R., & Ravid, T. (2016). Mapping  
689 the Landscape of a Eukaryotic Degronome. *Mol.Cell*, *63*, 1055-1065.
- 690 Gueneau, E., Dherin, C., Legrand, P., Tellier-Lebegue, C., Gilquin, B., Bonnesoeur, P., Londino, F.,  
691 Quemener, C., Le Du, M. H., Marquez, J. A., Moutiez, M., Gondry, M., Boiteux, S., &  
692 Charbonnier, J. B. (2013). Structure of the MutLalpha C-terminal domain reveals how Mlh1  
693 contributes to Pms1 endonuclease site. *Nat.Struct.Mol.Biol.*, *20*, 461-468.
- 694 Guerois, R., Nielsen, J. E., & Serrano, L. (2002). Predicting changes in the stability of proteins and  
695 protein complexes: a study of more than 1000 mutations. *J.Mol.Biol.*, *320*, 369-387.
- 696 Hampel, H., Frankel, W. L., Martin, E., Arnold, M., Khanduja, K., Kuebler, P., Clendenning, M.,  
697 Sotamaa, K., Prior, T., Westman, J. A., Panescu, J., Fix, D., Lockman, J., LaJeunesse, J.,  
698 Comeras, I., & de la Chapelle, A. (2008). Feasibility of screening for Lynch syndrome among  
699 patients with colorectal cancer. *J.Clin.Oncol.*, *26*, 5783-5788.
- 700 Heinen, C. D. (2010). Genotype to phenotype: analyzing the effects of inherited mutations in  
701 colorectal cancer families. *Mutat.Res.*, *693*, 32-45.
- 702 Hinrichsen, I., Wessbecher, I. M., Huhn, M., Passmann, S., Zeuzem, S., Plotz, G., Biondi, R. M., &  
703 Brieger, A. (2017). Phosphorylation-dependent signaling controls degradation of DNA  
704 mismatch repair protein PMS2. *Mol.Carcinog.*, *56*, 2663-2668.
- 705 Ioannidis, N. M., Rothstein, J. H., Pejaver, V., Middha, S., McDonnell, S. K., Baheti, S., Musolf, A.,  
706 Li, Q., Holzinger, E., Karyadi, D., Cannon-Albright, L. A., Teerlink, C. C., Stanford, J. L.,  
707 Isaacs, W. B., Xu, J., Cooney, K. A., Lange, E. M., Schleutker, J., Carpten, J. D., Powell, I.  
708 J., Cussenot, O., Cancel-Tassin, G., Giles, G. G., MacInnis, R. J., Maier, C., Hsieh, C. L.,  
709 Wiklund, F., Catalona, W. J., Foulkes, W. D., Mandal, D., Eeles, R. A., Kote-Jarai, Z.,  
710 Bustamante, C. D., Schaid, D. J., Hastie, T., Ostrander, E. A., Bailey-Wilson, J. E., Radivojac,  
711 P., Thibodeau, S. N., Whittemore, A. S., & Sieh, W. (2016). REVEL: An Ensemble Method  
712 for Predicting the Pathogenicity of Rare Missense Variants. *Am.J.Hum.Genet.*, *99*, 877-885.
- 713 Jaganathan, K., Kyriazopoulou, P. S., McRae, J. F., Darbandi, S. F., Knowles, D., Li, Y. I., Kosmicki,  
714 J. A., Arbelaez, J., Cui, W., Schwartz, G. B., Chow, E. D., Kanterakis, E., Gao, H., Kia, A.,  
715 Batzoglou, S., Sanders, S. J., & Farh, K. K. (2019). Predicting Splicing from Primary  
716 Sequence with Deep Learning. *Cell*, *176*, 535-548.
- 717 Jepsen, M. M., Fowler, D. M., Hartmann-Petersen, R., Stein, A., & Lindorff-Larsen, K. (2019).  
718 Classifying disease-associated variants using measures of protein activity and stability.  
719 *bioRxiv*, 688234.

- 720 Jiricny, J. (2006). The multifaceted mismatch-repair system. *Nat.Rev.Mol.Cell Biol.*, 7, 335-346.
- 721 Jiricny, J. (2013). Postreplicative mismatch repair. *Cold Spring Harb.Perspect.Biol.*, 5, a012633.
- 722 Jun, S. H., Kim, T. G., & Ban, C. (2006). DNA mismatch repair system. Classical and fresh roles.  
723 *FEBS J.*, 273, 1609-1619.
- 724 Kampmeyer, C., Nielsen, S. V., Clausen, L., Stein, A., Gerdes, A. M., Lindorff-Larsen, K., &  
725 Hartmann-Petersen, R. (2017). Blocking protein quality control to counter hereditary cancers.  
726 *Genes Chromosomes.Cancer*, 56, 823-831.
- 727 Kandasamy, G. & Andreasson, C. (2018). Hsp70-Hsp110 chaperones deliver ubiquitin-dependent  
728 and -independent substrates to the 26S proteasome for proteolysis in yeast. *J.Cell Sci.*, 131.
- 729 Karczewski, K. J., Francioli, L. C., Tiao, G., Cummings, B. B., Alfoldi, J., Wang, Q., Collins, R. L.,  
730 Laricchia, K. M., Ganna, A., Birnbaum, D. P., Gauthier, L. D., Brand, H., Solomonson, M.,  
731 Watts, N. A., Rhodes, D., Singer-Berk, M., Seaby, E. G., Kosmicki, J. A., Walters, R. K.,  
732 Tashman, K., Farjoun, Y., Banks, E., Poterba, T., Wang, A., Seed, C., Whiffin, N., Chong, J.  
733 X., Samocha, K. E., Pierce-Hoffman, E., Zappala, Z., Donnell-Luria, A. H., Minikel, E. V.,  
734 Weisburd, B., Lek, M., Ware, J. S., Vittal, C., Armean, I. M., Bergelson, L., Cibulskis, K.,  
735 Connolly, K. M., Covarrubias, M., Donnelly, S., Ferriera, S., Gabriel, S., Gentry, J., Gupta,  
736 N., Jeandet, T., Kaplan, D., Llanwarne, C., Munshi, R., Novod, S., Petrillo, N., Roazen, D.,  
737 Ruano-Rubio, V., Saltzman, A., Schleicher, M., Soto, J., Tibbetts, K., Tolonen, C., Wade, G.,  
738 Talkowski, M. E., The Genome Database Consortium, Neale, B. M., Daly, M. J., &  
739 MacArthur, D. G. (2019). Variation across 141,456 human exomes and genomes reveals the  
740 spectrum of loss-of-function intolerance across human protein-coding genes. *bioRxiv*,  
741 531210.
- 742 Karras, G. I., Yi, S., Sahni, N., Fischer, M., Xie, J., Vidal, M., D'Andrea, A. D., Whitesell, L., &  
743 Lindquist, S. (2017). HSP90 Shapes the Consequences of Human Genetic Variation. *Cell*,  
744 168, 856-866.
- 745 Kiel, C., Benisty, H., Llorens-Rico, V., & Serrano, L. (2016). The yin-yang of kinase activation and  
746 unfolding explains the peculiarity of Val600 in the activation segment of BRAF. *Elife.*, 5,  
747 e12814.
- 748 Kiel, C. & Serrano, L. (2014). Structure-energy-based predictions and network modelling of  
749 RASopathy and cancer missense mutations. *Mol.Syst.Biol.*, 10, 727.
- 750 Kim, I., Miller, C. R., Young, D. L., & Fields, S. (2013). High-throughput analysis of in vivo protein  
751 stability. *Mol.Cell Proteomics.*, 12, 3370-3378.

- 752 Kondo, E., Horii, A., & Fukushige, S. (2001). The interacting domains of three MutL heterodimers  
753 in man: hMLH1 interacts with 36 homologous amino acid residues within hMLH3, hPMS1  
754 and hPMS2. *Nucleic Acids Res.*, *29*, 1695-1702.
- 755 Kosinski, J., Hinrichsen, I., Bujnicki, J. M., Friedhoff, P., & Plotz, G. (2010). Identification of Lynch  
756 syndrome mutations in the MLH1-PMS2 interface that disturb dimerization and mismatch  
757 repair. *Hum.Mutat.*, *31*, 975-982.
- 758 Kriegenburg, F., Jakopiec, V., Poulsen, E. G., Nielsen, S. V., Roguev, A., Krogan, N., Gordon, C.,  
759 Fleig, U., & Hartmann-Petersen, R. (2014). A chaperone-assisted degradation pathway targets  
760 kinetochore proteins to ensure genome stability. *PLoS.Genet.*, *10*, e1004140.
- 761 Landrum, M. J., Lee, J. M., Benson, M., Brown, G. R., Chao, C., Chitipiralla, S., Gu, B., Hart, J.,  
762 Hoffman, D., Jang, W., Karapetyan, K., Katz, K., Liu, C., Maddipatla, Z., Malheiro, A.,  
763 McDaniel, K., Ovetsky, M., Riley, G., Zhou, G., Holmes, J. B., Kattman, B. L., & Maglott,  
764 D. R. (2018). ClinVar: improving access to variant interpretations and supporting evidence.  
765 *Nucleic Acids Res.*, *46*, D1062-D1067.
- 766 Lek, M., Karczewski, K. J., Minikel, E. V., Samocha, K. E., Banks, E., Fennell, T., O'Donnell-Luria,  
767 A. H., Ware, J. S., Hill, A. J., Cummings, B. B., Tukiainen, T., Birnbaum, D. P., Kosmicki, J.  
768 A., Duncan, L. E., Estrada, K., Zhao, F., Zou, J., Pierce-Hoffman, E., Berghout, J., Cooper,  
769 D. N., DeFlaux, N., DePristo, M., Do, R., Flannick, J., Fromer, M., Gauthier, L., Goldstein, J.,  
770 Gupta, N., Howrigan, D., Kiezun, A., Kurki, M. I., Moonshine, A. L., Natarajan, P., Orozco,  
771 L., Peloso, G. M., Poplin, R., Rivas, M. A., Ruano-Rubio, V., Rose, S. A., Ruderfer, D. M.,  
772 Shakir, K., Stenson, P. D., Stevens, C., Thomas, B. P., Tiao, G., Tusie-Luna, M. T., Weisburd,  
773 B., Won, H. H., Yu, D., Altshuler, D. M., Ardissino, D., Boehnke, M., Danesh, J., Donnelly,  
774 S., Elosua, R., Florez, J. C., Gabriel, S. B., Getz, G., Glatt, S. J., Hultman, C. M., Kathiresan,  
775 S., Laakso, M., McCarroll, S., McCarthy, M. I., McGovern, D., McPherson, R., Neale, B. M.,  
776 Palotie, A., Purcell, S. M., Saleheen, D., Scharf, J. M., Sklar, P., Sullivan, P. F., Tuomilehto,  
777 J., Tsuang, M. T., Watkins, H. C., Wilson, J. G., Daly, M. J., & MacArthur, D. G. (2016).  
778 Analysis of protein-coding genetic variation in 60,706 humans. *Nature*, *536*, 285-291.
- 779 Li, G. M. & Modrich, P. (1995). Restoration of mismatch repair to nuclear extracts of H6 colorectal  
780 tumor cells by a heterodimer of human MutL homologs. *Proc.Natl.Acad.Sci.U.S.A*, *92*, 1950-  
781 1954.
- 782 Lynch, H. T., Snyder, C. L., Shaw, T. G., Heinen, C. D., & Hitchins, M. P. (2015). Milestones of  
783 Lynch syndrome: 1895-2015. *Nat.Rev.Cancer*, *15*, 181-194.
- 784 Manolio, T. A., Fowler, D. M., Starita, L. M., Haendel, M. A., MacArthur, D. G., Biesecker, L. G.,  
785 Worthey, E., Chisholm, R. L., Green, E. D., Jacob, H. J., McLeod, H. L., Roden, D.,  
786 Rodriguez, L. L., Williams, M. S., Cooper, G. M., Cox, N. J., Herman, G. E., Kingsmore, S.,  
787 Lo, C., Lutz, C., MacRae, C. A., Nussbaum, R. L., Ordovas, J. M., Ramos, E. M., Robinson,  
788 P. N., Rubinstein, W. S., Seidman, C., Stranger, B. E., Wang, H., Westerfield, M., & Bult, C.

- 789 (2017). Bedside Back to Bench: Building Bridges between Basic and Clinical Genomic  
790 Research. *Cell*, 169, 6-12.
- 791 Mathiassen, S. G., Larsen, I. B., Poulsen, E. G., Madsen, C. T., Papaleo, E., Lindorff-Larsen, K.,  
792 Kragelund, B. B., Nielsen, M. L., Kriegenburg, F., & Hartmann-Petersen, R. (2015). A Two-  
793 step Protein Quality Control Pathway for a Misfolded DJ-1 Variant in Fission Yeast.  
794 *J.Biol.Chem.*, 290, 21141-21153.
- 795 Matreyek, K. A., Starita, L. M., Stephany, J. J., Martin, B., Chiasson, M. A., Gray, V. E., Kircher,  
796 M., Khechaduri, A., Dines, J. N., Hause, R. J., Bhatia, S., Evans, W. E., Relling, M. V., Yang,  
797 W., Shendure, J., & Fowler, D. M. (2018). Multiplex assessment of protein variant abundance  
798 by massively parallel sequencing. *Nat.Genet.*, 50, 874-882.
- 799 Maurer, M. J., Spear, E. D., Yu, A. T., Lee, E. J., Shahzad, S., & Michaelis, S. (2016). Degradation  
800 Signals for Ubiquitin-Proteasome Dependent Cytosolic Protein Quality Control (CytoQC) in  
801 Yeast. *G3.(Bethesda.)*.
- 802 McShane, E., Sin, C., Zauber, H., Wells, J. N., Donnelly, N., Wang, X., Hou, J., Chen, W., Storchova,  
803 Z., Marsh, J. A., Valleriani, A., & Selbach, M. (2016). Kinetic Analysis of Protein Stability  
804 Reveals Age-Dependent Degradation. *Cell*, 167, 803-815.
- 805 Mitchell, A. L., Attwood, T. K., Babbitt, P. C., Blum, M., Bork, P., Bridge, A., Brown, S. D., Chang,  
806 H. Y., El-Gebali, S., Fraser, M. I., Gough, J., Haft, D. R., Huang, H., Letunic, I., Lopez, R.,  
807 Luciani, A., Madeira, F., Marchler-Bauer, A., Mi, H., Natale, D. A., Necci, M., Nuka, G.,  
808 Orengo, C., Pandurangan, A. P., Paysan-Lafosse, T., Pesseat, S., Potter, S. C., Qureshi, M.  
809 A., Rawlings, N. D., Redaschi, N., Richardson, L. J., Rivoire, C., Salazar, G. A., Sangrador-  
810 Vegas, A., Sigrist, C. J. A., Sillitoe, I., Sutton, G. G., Thanki, N., Thomas, P. D., Tosatto, S.  
811 C. E., Yong, S. Y., & Finn, R. D. (2019). InterPro in 2019: improving coverage, classification  
812 and access to protein sequence annotations. *Nucleic Acids Res.*, 47, D351-D360.
- 813 Mohd, A. B., Palama, B., Nelson, S. E., Tomer, G., Nguyen, M., Huo, X., & Buermeier, A. B. (2006).  
814 Truncation of the C-terminus of human MLH1 blocks intracellular stabilization of PMS2 and  
815 disrupts DNA mismatch repair. *DNA Repair (Amst)*, 5, 347-361.
- 816 Moller, P., Seppala, T. T., Bernstein, I., Holinski-Feder, E., Sala, P., Gareth, E. D., Lindblom, A.,  
817 Macrae, F., Blanco, I., Sijmons, R. H., Jeffries, J., Vasen, H. F. A., Burn, J., Nakken, S.,  
818 Hovig, E., Rodland, E. A., Tharmaratnam, K., de Vos Tot Nederveen Cappel WH, Hill, J.,  
819 Wijnen, J. T., Jenkins, M. A., Green, K., Lalloo, F., Sunde, L., Mints, M., Bertario, L., Pineda,  
820 M., Navarro, M., Morak, M., Renkonen-Sinisalo, L., Valentin, M. D., Frayling, I. M., Plazzer,  
821 J. P., Pylvanainen, K., Genuardi, M., Mecklin, J. P., Moeslein, G., Sampson, J. R., & Capella,  
822 G. (2018). Cancer risk and survival in path\_MMR carriers by gene and gender up to 75 years  
823 of age: a report from the Prospective Lynch Syndrome Database. *Gut*, 67, 1306-1316.

- 824 Nielsen, S. V., Poulsen, E. G., Rebula, C. A., & Hartmann-Petersen, R. (2014). Protein quality control  
825 in the nucleus. *Biomolecules.*, *4*, 646-661.
- 826 Nielsen, S. V., Stein, A., Dinitzen, A. B., Papaleo, E., Tatham, M. H., Poulsen, E. G., Kassem, M.  
827 M., Rasmussen, L. J., Lindorff-Larsen, K., & Hartmann-Petersen, R. (2017). Predicting the  
828 impact of Lynch syndrome-causing missense mutations from structural calculations.  
829 *PLoS.Genet.*, *13*, e1006739.
- 830 Olzmann, J. A., Brown, K., Wilkinson, K. D., Rees, H. D., Huai, Q., Ke, H., Levey, A. I., Li, L., &  
831 Chin, L. S. (2004). Familial Parkinson's disease-associated L166P mutation disrupts DJ-1  
832 protein folding and function. *J.Biol.Chem.*, *279*, 8506-8515.
- 833 Palomaki, G. E., McClain, M. R., Melillo, S., Hampel, H. L., & Thibodeau, S. N. (2009). EGAPP  
834 supplementary evidence review: DNA testing strategies aimed at reducing morbidity and  
835 mortality from Lynch syndrome. *Genet.Med.*, *11*, 42-65.
- 836 Peltomaki, P. (2016). Update on Lynch syndrome genomics. *Fam.Cancer*, *15*, 385-393.
- 837 Peltomaki, P., Aaltonen, L. A., Sistonen, P., Pylkkanen, L., Mecklin, J. P., Jarvinen, H., Green, J. S.,  
838 Jass, J. R., Weber, J. L., Leach, F. S., & . (1993). Genetic mapping of a locus predisposing to  
839 human colorectal cancer. *Science*, *260*, 810-812.
- 840 Peltomaki, P. & Vasen, H. F. (1997). Mutations predisposing to hereditary nonpolyposis colorectal  
841 cancer: database and results of a collaborative study. The International Collaborative Group  
842 on Hereditary Nonpolyposis Colorectal Cancer. *Gastroenterology*, *113*, 1146-1158.
- 843 Perera, S. & Bapat, B. (2008). The MLH1 variants p.Arg265Cys and p.Lys618Ala affect protein  
844 stability while p.Leu749Gln affects heterodimer formation. *Hum.Mutat.*, *29*, 332.
- 845 Pey, A. L., Stricher, F., Serrano, L., & Martinez, A. (2007). Predicted effects of missense mutations  
846 on native-state stability account for phenotypic outcome in phenylketonuria, a paradigm of  
847 misfolding diseases. *Am.J.Hum.Genet.*, *81*, 1006-1024.
- 848 Plaschke, J., Engel, C., Kruger, S., Holinski-Feder, E., Pagenstecher, C., Mangold, E., Moeslein, G.,  
849 Schulmann, K., Gebert, J., von Knebel, D. M., Ruschoff, J., Loeffler, M., & Schackert, H. K.  
850 (2004). Lower incidence of colorectal cancer and later age of disease onset in 27 families with  
851 pathogenic MSH6 germline mutations compared with families with MLH1 or MSH2  
852 mutations: the German Hereditary Nonpolyposis Colorectal Cancer Consortium.  
853 *J.Clin.Oncol.*, *22*, 4486-4494.
- 854 Raevaara, T. E., Korhonen, M. K., Lohi, H., Hampel, H., Lynch, E., Lonnqvist, K. E., Holinski-Feder,  
855 E., Sutter, C., McKinnon, W., Duraisamy, S., Gerdes, A. M., Peltomaki, P., Kohonen-Ccorish,  
856 M., Mangold, E., Macrae, F., Greenblatt, M., de la Chapelle, A., & Nystrom, M. (2005).

- 857 Functional significance and clinical phenotype of nontruncating mismatch repair variants of  
858 MLH1. *Gastroenterology*, 129, 537-549.
- 859 Raschle, M., Dufner, P., Marra, G., & Jiricny, J. (2002). Mutations within the hMLH1 and hPMS2  
860 subunits of the human MutLalpha mismatch repair factor affect its ATPase activity, but not  
861 its ability to interact with hMutSalpha. *J.Biol.Chem.*, 277, 21810-21820.
- 862 Ravid, T. & Hochstrasser, M. (2008). Diversity of degradation signals in the ubiquitin-proteasome  
863 system. *Nat.Rev.Mol.Cell Biol.*, 9, 679-690.
- 864 Rosenbaum, J. C., Fredrickson, E. K., Oeser, M. L., Garrett-Engele, C. M., Locke, M. N., Richardson,  
865 L. A., Nelson, Z. W., Hetrick, E. D., Milac, T. I., Gottschling, D. E., & Gardner, R. G. (2011).  
866 Disorder targets disorder in nuclear quality control degradation: a disordered ubiquitin ligase  
867 directly recognizes its misfolded substrates. *Mol.Cell*, 41, 93-106.
- 868 Sachadyn, P. (2010). Conservation and diversity of MutS proteins. *Mutat.Res.*, 694, 20-30.
- 869 Samant, R. S., Livingston, C. M., Sontag, E. M., & Frydman, J. (2018). Distinct proteostasis circuits  
870 cooperate in nuclear and cytoplasmic protein quality control. *Nature*, 563, 407-411.
- 871 Scheller, R., Stein, A., Nielsen, S. V., Marin, F. I., Gerdes, A. M., Di, M. M., Papaleo, E., Lindorff-  
872 Larsen, K., & Hartmann-Petersen, R. (2019). Toward mechanistic models for genotype-  
873 phenotype correlations in phenylketonuria using protein stability calculations. *Hum.Mutat.*,  
874 40, 444-457.
- 875 Schymkowitz, J., Borg, J., Stricher, F., Nys, R., Rousseau, F., & Serrano, L. (2005). The FoldX web  
876 server: an online force field. *Nucleic Acids Res.*, 33, W382-W388.
- 877 Shimodaira, H., Filosi, N., Shibata, H., Suzuki, T., Radice, P., Kanamaru, R., Friend, S. H., Kolodner,  
878 R. D., & Ishioka, C. (1998). Functional analysis of human MLH1 mutations in *Saccharomyces*  
879 *cerevisiae*. *Nat.Genet.*, 19, 384-389.
- 880 Sijmons, R. H. & Hofstra, R. M. (2016). Review: Clinical aspects of hereditary DNA Mismatch repair  
881 gene mutations. *DNA Repair (Amst)*, 38, 155-162.
- 882 Stein, A., Fowler, D. M., Hartmann-Petersen, R., & Lindorff-Larsen, K. (2019). Biophysical and  
883 Mechanistic Models for Disease-Causing Protein Variants. *Trends Biochem.Sci.*
- 884 Suri, M., Evers, J. M. G., Laskowski, R. A., O'Brien, S., Baker, K., Clayton-Smith, J., Dabir, T.,  
885 Josifova, D., Joss, S., Kerr, B., Kraus, A., McEntagart, M., Morton, J., Smith, A., Splitt, M.,  
886 Thornton, J. M., & Wright, C. F. (2017). Protein structure and phenotypic analysis of  
887 pathogenic and population missense variants in STXBP1. *Mol.Genet.Genomic.Med.*, 5, 495-  
888 507.



- 889 Takahashi, M., Shimodaira, H., Andreutti-Zaugg, C., Iggo, R., Kolodner, R. D., & Ishioka, C. (2007).  
890 Functional analysis of human MLH1 variants using yeast and in vitro mismatch repair assays.  
891 *Cancer Res.*, *67*, 4595-4604.
- 892 Thompson, B. A., Spurdle, A. B., Plazzer, J. P., Greenblatt, M. S., Akagi, K., Al-Mulla, F., Bapat,  
893 B., Bernstein, I., Capella, G., den Dunnen, J. T., du, S. D., Fabre, A., Farrell, M. P., Farrington,  
894 S. M., Frayling, I. M., Frebourg, T., Goldgar, D. E., Heinen, C. D., Holinski-Feder, E.,  
895 Kohonen-Corish, M., Robinson, K. L., Leung, S. Y., Martins, A., Moller, P., Morak, M.,  
896 Nystrom, M., Peltomaki, P., Pineda, M., Qi, M., Ramesar, R., Rasmussen, L. J., Royer-  
897 Pokora, B., Scott, R. J., Sijmons, R., Tavgigian, S. V., Tops, C. M., Weber, T., Wijnen, J.,  
898 Woods, M. O., Macrae, F., & Genuardi, M. (2014). Application of a 5-tiered scheme for  
899 standardized classification of 2,360 unique mismatch repair gene variants in the InSiGHT  
900 locus-specific database. *Nat.Genet.*, *46*, 107-115.
- 901 Tokuriki, N. & Tawfik, D. S. (2009). Stability effects of mutations and protein evolvability.  
902 *Curr.Opin.Struct.Biol.*, *19*, 596-604.
- 903 Tomer, G., Buermeyer, A. B., Nguyen, M. M., & Liskay, R. M. (2002). Contribution of human mlh1  
904 and pms2 ATPase activities to DNA mismatch repair. *J.Biol.Chem.*, *277*, 21801-21809.
- 905 van der Lee, R., Lang, B., Kruse, K., Gsponer, J., Sanchez de, G. N., Huynen, M. A., Matouschek,  
906 A., Fuxreiter, M., & Babu, M. M. (2014). Intrinsically disordered segments affect protein half-  
907 life in the cell and during evolution. *Cell Rep.*, *8*, 1832-1844.
- 908 Vasen, H. F. & de Vos Tot Nederveen Cappel WH (2013). A hundred years of Lynch syndrome  
909 research (1913-2013). *Fam.Cancer*, *12*, 141-142.
- 910 Vasen, H. F., Wijnen, J. T., Menko, F. H., Kleibeuker, J. H., Taal, B. G., Griffioen, G., Nagengast, F.  
911 M., Meijers-Heijboer, E. H., Bertario, L., Varesco, L., Bisgaard, M. L., Mohr, J., Fodde, R.,  
912 & Khan, P. M. (1996). Cancer risk in families with hereditary nonpolyposis colorectal cancer  
913 diagnosed by mutation analysis. *Gastroenterology*, *110*, 1020-1027.
- 914 Wagih, O., Galardini, M., Busby, B. P., Memon, D., Typas, A., & Beltrao, P. (2018). A resource of  
915 variant effect predictions of single nucleotide variants in model organisms. *Mol.Syst.Biol.*, *14*,  
916 e8430.
- 917 Wu, H., Zeng, H., Lam, R., Tempel, W., Kerr, I. D., & Min, J. (2015). Structure of the human MLH1  
918 N-terminus: implications for predisposition to Lynch syndrome. *Acta*  
919 *Crystallogr.F.Struct.Biol.Commun.*, *71*, 981-985.
- 920 Wu, X., Platt, J. L., & Cascalho, M. (2003). Dimerization of MLH1 and PMS2 limits nuclear  
921 localization of MutLalpha. *Mol.Cell Biol.*, *23*, 3320-3328.

- 922 Yanagitani, K., Juskiewicz, S., & Hegde, R. S. (2017). UBE2O is a quality control factor for orphans  
923 of multiprotein complexes. *Science*, 357, 472-475.
- 924 Zimmermann, L., Stephens, A., Nam, S. Z., Rau, D., Kubler, J., Lozajic, M., Gabler, F., Soding, J.,  
925 Lupas, A. N., & Alva, V. (2018). A Completely Reimplemented MPI Bioinformatics Toolkit  
926 with a New HHpred Server at its Core. *J.Mol.Biol.*, 430, 2237-2243.  
927  
928

929 **Figure legends**

930

931 **Figure 1. MLH1 structural stability predictions.** (A) Structure of MLH1 (PDB IDs 4P7A and  
932 3RBN). Positions of variants tested in this work are highlighted with coloured spheres, indicating the  
933 predicted  $\Delta\Delta G$  (<0.5 kcal/mol, purple, <1, cyan, <3.5 green, <7, yellow, <12, orange, >12, red). (B)  
934 Many disease-linked MLH1 missense variants (red) are structurally destabilized and therefore,  
935 compared to wild-type MLH1 (green), more likely to unfold. (C) The free energy of the folded  
936 conformation of a destabilized missense variant (red) is closer to that of the fully unfolded state. The  
937 employed stability calculations predict the difference of the free energy ( $\Delta\Delta G$ ) between a missense  
938 variant (red) and wild-type MLH1 (green). (D) Excerpt of the *in silico* saturation mutagenesis map  
939 (full dataset provided in supplemental material file 1). (E) Distribution of all predicted  $\Delta\Delta G$ s from  
940 saturation mutagenesis. The peak at 15 kcal/mol contains all variants with  $\Delta\Delta G$  values greater than  
941 this value.

942

943 **Figure 2. Steady-state levels of MLH1 variants correlate with structural stability predictions.**  
944 (A) Example of the immunofluorescence imaging of HCT116 cells using antibodies to MLH1.  
945 Hoechst staining was used to mark the nucleus. Note the reduced steady-state levels of the G67R  
946 MLH1 variant compared to wild-type MLH1. (B) The total fluorescent intensity for each of the 69  
947 different MLH1 variants was determined after excluding the non-transfected cells and normalizing  
948 the intensities to that for wild-type MLH1. The intensities were then plotted vs. the predicted  $\Delta\Delta G$   
949 values. Between 200 and 1,000 cells were included for each quantification. The error bars indicate  
950 the standard error of the mean (n = 5 experiments). Each variant is color-coded according to the  
951 ClinVar disease category. (C) Distribution of steady-state levels by DME category – 0 is loss-of-  
952 function in all assays by Takahashi *et al.* (Takahashi et al., 2007), 3 represents function in all these  
953 assays (for details see the Materials and Methods). Raincloud plot visualization as described in (Allen  
954 et al., 2018) Coloured surface, smoothed density estimate. Gray dots represent means within each  
955 DME category, with bars for standard error. (D) Distribution of FoldX  $\Delta\Delta G$ s across DME categories  
956 (as in (C)). (E) FoldX  $\Delta\Delta G$ s for all variants tested in this work, indicating their position in the MLH1  
957 sequence. As elsewhere, values above 15 kcal/mol were here set to this value. See also Figure 2 -  
958 figure supplements 1 and 2.

959

960 **Figure 3. Many MLH1 variants are degraded by the proteasome.** (A) HCT116 cells transfected  
961 with the indicated MLH1 variants were analyzed by blotting with antibodies to MLH1. Co-  
962 transfection with a plasmid expressing GFP was included to test the transfection efficiencies between  
963 the MLH1 variants.  $\beta$ -actin served as a loading control. (B) Quantification of blots as in (A)  
964 normalized to the steady-state level of wild-type (WT) MLH1. The error bars show the standard  
965 deviation (n=3). (C) MLH1-transfected HCT116 cells were treated with 25  $\mu$ g/mL cycloheximide  
966 (CHX) for 0, 4, 8 or 12 hours, and lysates were analyzed by blotting using antibodies to MLH1.  $\beta$ -  
967 actin was used as a loading control. (D) Quantification of blots as in panel (C), normalized to the  
968 steady-state levels at t = 0 hours. The error bars indicate the standard deviation (n=3). (E) Western  
969 blotting with antibodies to MLH1 of whole cell lysates from transfected cells either untreated or

970 treated for 16 hours with 10  $\mu$ M bortezomib (BZ). Blotting for  $\beta$ -actin was included as a loading  
971 control. See also Figure 3 – figure supplement.

972

973 **Figure 4. Stable MLH1 variants increase steady-state levels of PMS1 and PMS2.** (A) The levels  
974 of endogenous PMS1 and PMS2 were determined by blotting of whole-cell lysates of HCT116 cells  
975 transfected with either empty vector or with wild-type MLH1 and treated with 25  $\mu$ g/mL  
976 cycloheximide (CHX) for 0, 4, 8 or 12 hours. The antibodies used were to PMS1 and PMS2, and as  
977 a control to MLH1.  $\beta$ -actin served as loading control. (B) Quantification of blots as in panel (A)  
978 normalized to protein levels at 0 hours. The error bars indicate the standard deviation (n=3). (C) The  
979 levels of endogenous MLH1, PMS1 and PMS2 were compared by blotting of cell lysates of HCT116  
980 cells either untreated, or treated with cycloheximide (CHX) or with bortezomib (BZ) and CHX.  $\beta$ -  
981 actin served as loading control. (D) The levels of endogenous PMS1 and PMS2 and transfected  
982 MLH1 were compared by Western blotting using antibodies to PMS1, PMS2 and MLH1.  $\beta$ -actin  
983 served as loading control. (E) Quantification of blots as in panel (C) normalized to the level of  
984 endogenous PMS1 (grey) or PMS2 (red) in untransfected HCT116 cells. The error bars show the  
985 standard deviation (n=3). (F) Plotting the levels of the MLH1 variants vs. the levels of endogenous  
986 PMS1 (grey) and PMS2 (red). The error bars show the standard deviation (n=3). (G) The levels of  
987 MLH1 and YFP-tagged PMS2 were analyzed by SDS-PAGE and blotting of whole-cell lysates of  
988 HCT116 cells transfected with the indicated expression plasmids.  $\beta$ -actin was included as loading  
989 control. (H) Co-transfected PMS2-YFP was immunoprecipitated (IP) using GFP-trap beads, and the  
990 precipitated material was analyzed by electrophoresis and blotting. Bortezomib was added to all  
991 cultures 16 hours prior to cell lysis to ensure ample amounts of the unstable MLH1 variants.

992

993 **Figure 5. Molecular chaperones play a role in the proteasomal degradation of MLH1.** (A) Co-  
994 transfected HSP70-myc was immunoprecipitated (IP) using myc-trap beads and analyzed by blotting  
995 with antibodies to the myc-tag (HSP70) and MLH1. Bortezomib was added to all cultures 8 hours  
996 prior to cell lysis to ensure ample amounts of the unstable MLH1 variants. (B) Quantification of blots  
997 as shown in panel (A) normalized to level of wild-type MLH1. The error bars indicate the standard  
998 deviation (n=3). (C) Co-transfected HSP90-HA was immunoprecipitated (IP) with anti-HA resin, and  
999 the precipitated material analyzed by electrophoresis and Western blotting using antibodies to the  
1000 HA-tag (HSP90) and MLH1. As above, bortezomib was added to all cultures prior to cell lysis. (D)  
1001 Quantification of blots as in panel (C) normalized to amount of precipitated wild-type MLH1. The  
1002 error bars show the standard deviation (n=3). (E) Western blotting using antibodies to MLH1 of  
1003 whole-cell lysates from transfected cells treated with 5  $\mu$ M YM01 for 24 hours as indicated. (F)  
1004 Quantification of blots as shown in panel (E) normalized to level of MLH1 without YM01. The error  
1005 bars indicate the standard deviation (n=3). (G) Western blotting using antibodies to MLH1 of whole-  
1006 cell lysates from transfected cells treated 1  $\mu$ M geldanamycin (GA) for 24 hours. (H) Quantification  
1007 of blots as shown in panel (G) normalized to level of MLH1 without GA. The error bars indicate the  
1008 standard deviation (n=3).

1009

1010 **Figure 6. Assessing stability calculations for predicting pathogenicity.** (A) Plot of  $\Delta\Delta$ G-values  
1011 vs. allele frequencies for all variants listed in gnomAD (gray), as well as those analyzed by Takahashi

1012 *et al.*; the latter are color-coded by DME. Note that the leftmost group of colored dots are variants  
1013 that have been reported in patients, but are not recorded in gnomAD (thus their allele frequency in  
1014 gnomAD is zero). Variants with common to intermediate frequencies are all predicted to be stable,  
1015 while some rare variants are predicted to be destabilized. (B) FoldX  $\Delta\Delta G$  for benign (blue), likely  
1016 benign (cyan), likely pathogenic (orange), and pathogenic (red) variants that are reported in ClinVar  
1017 with “at least one star” curation. The whiskers represent the mean and standard error of the mean. (C)  
1018 Evolutionary sequence energies for ClinVar-reported variants, color scheme as in (B). The whiskers  
1019 represent the mean and standard error of the mean. (D) Landscape of variant tolerance by combination  
1020 of changes in protein stability (x axis) and evolutionary sequence energies (y axis), such that the upper  
1021 right corner indicates most likely detrimental variants, while those in the lower left corner are  
1022 predicted stable and observed in MLH1 homologs. The green background density illustrates the  
1023 distribution of all variants listed in gnomAD. The combination of metrics captures most non-  
1024 functional variants (DME scores 0 or 1). Outliers are discussed in the main text. (E) Logistic  
1025 regression model of FoldX  $\Delta\Delta G$ s and evolutionary sequence energies. Pathogenic variants in red,  
1026 benign in blue. Dot shape indicates whether pathogenicity of the respective variant was correctly  
1027 predicted by regression model trained on all but this data point (“jackknife”, TP, true positives, FN,  
1028 false negatives, FP, false positives, TN, true negatives). (F) ROC curves for logistic regression model,  
1029 FoldX  $\Delta\Delta G$ s, evolutionary sequence energies, and ensemble-predictor REVEL to assess their  
1030 performance in separating benign from pathogenic variants. TPR, true positive rate. FPR, false  
1031 positive rate. Standard deviations in AUC were determined by performing 100 ROC analyses on  
1032 randomly sampled but balanced subsets, so that there are equal numbers of positive and negative  
1033 cases. (G) Integrating potential effects these variants may have on splicing in the genomic context.  
1034 Purple squares indicate pathogenic variants that are predicted to affect splicing (SpliceAI, threshold  
1035 0.5). No benign variants are predicted to affect splicing. See also Figure 6 - figure supplements 1, 2  
1036 and 3.

1037  
1038 **Figure 7. Model for how structural destabilization of MLH1 contributes to disease.** The wild-  
1039 type (green) MLH1-PMS2 heterodimer promotes DNA mismatch repair. Disease-linked missense  
1040 MLH1 variants (red) may also promote DNA repair, but are at risk of dissociating from PMS2 due to  
1041 structural destabilization. The structural destabilization of MLH1 may also cause a partial unfolding  
1042 of MLH1 which is recognized by the molecular chaperone HSP70 and causes proteasomal  
1043 degradation of the MLH1 variant. In turn, the degradation of MLH1 leaves PMS2 without a partner  
1044 protein, resulting in proteasomal degradation of PMS2.

1045

Figure 1

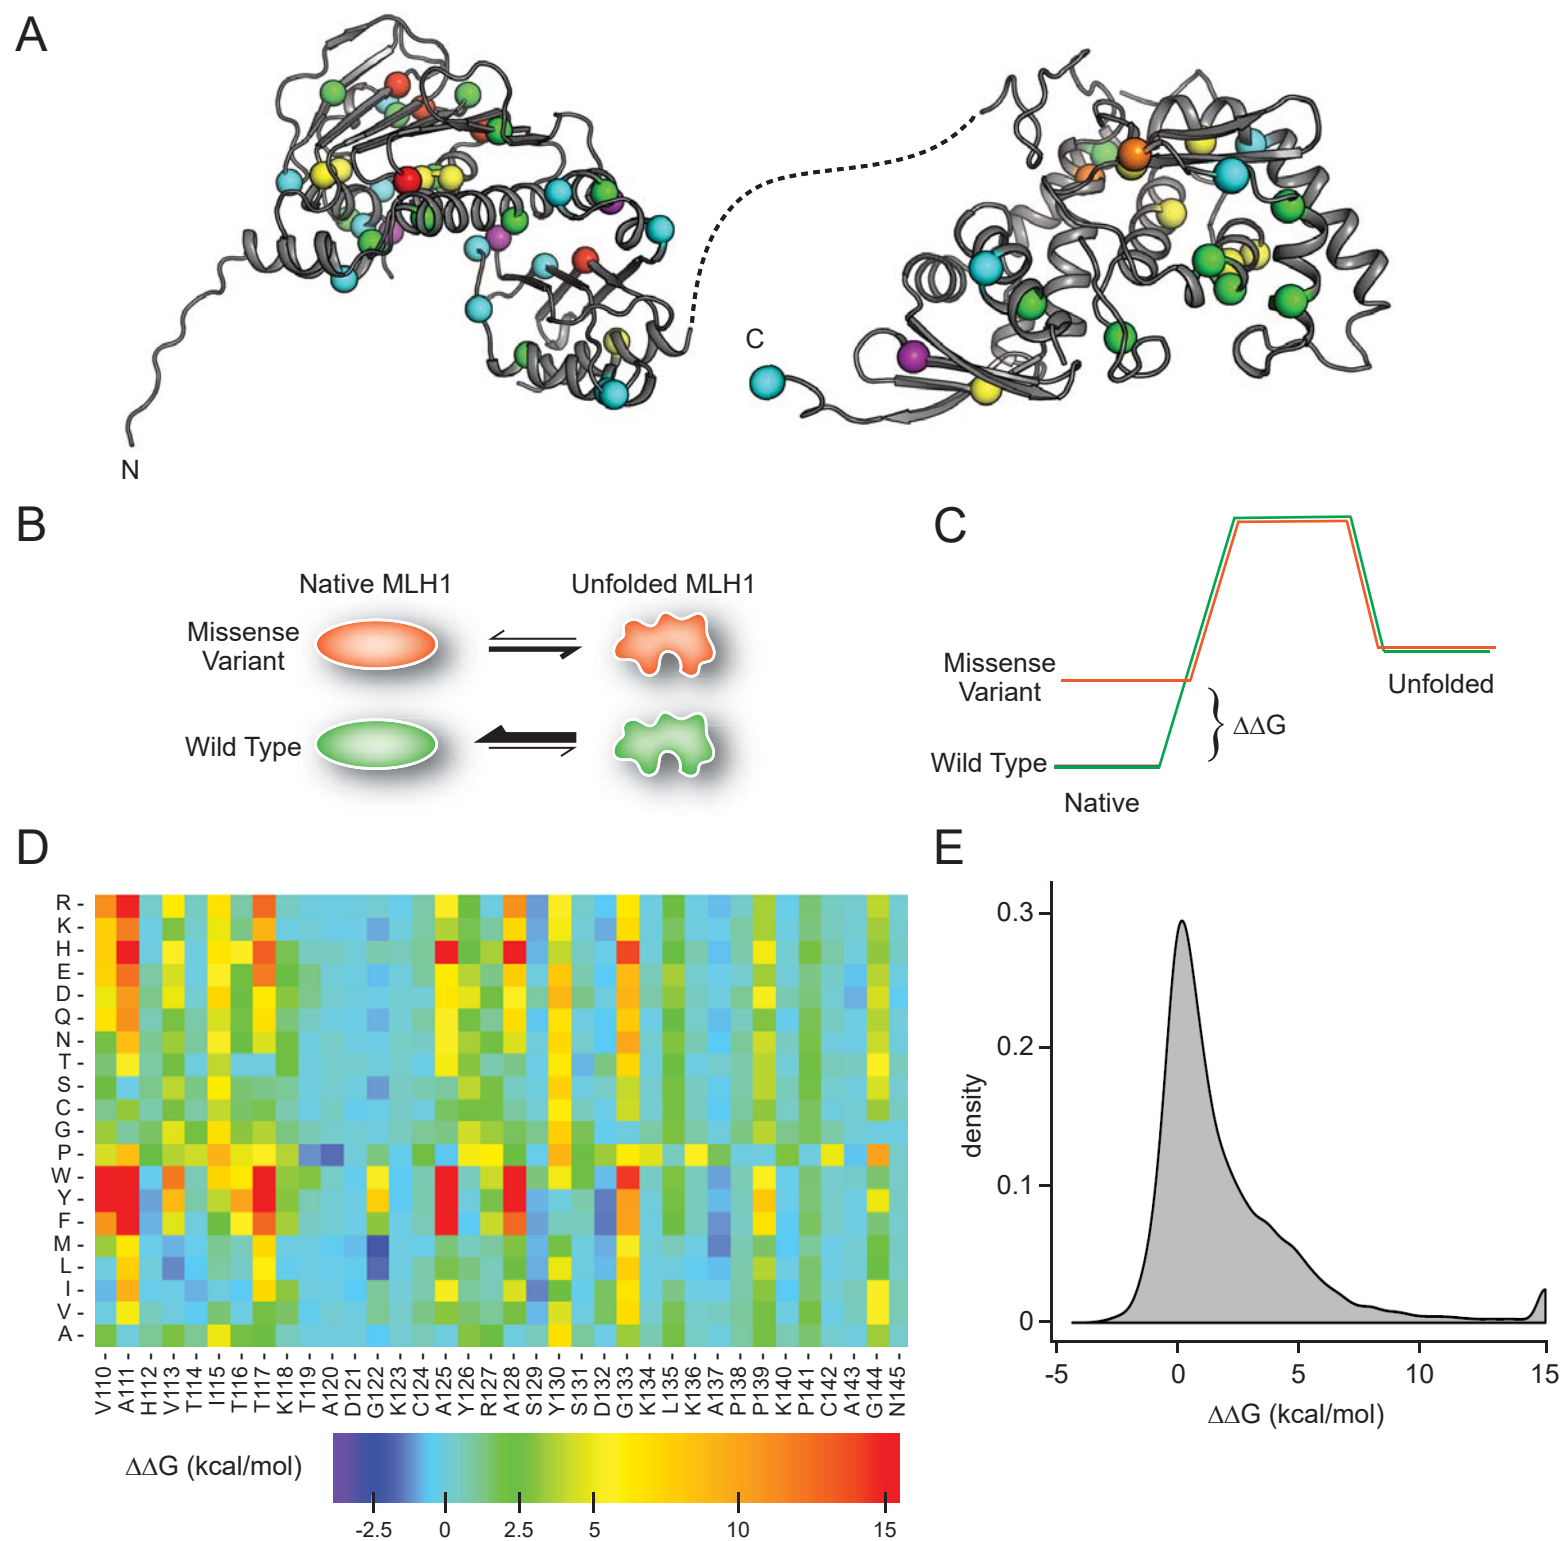

Figure 2

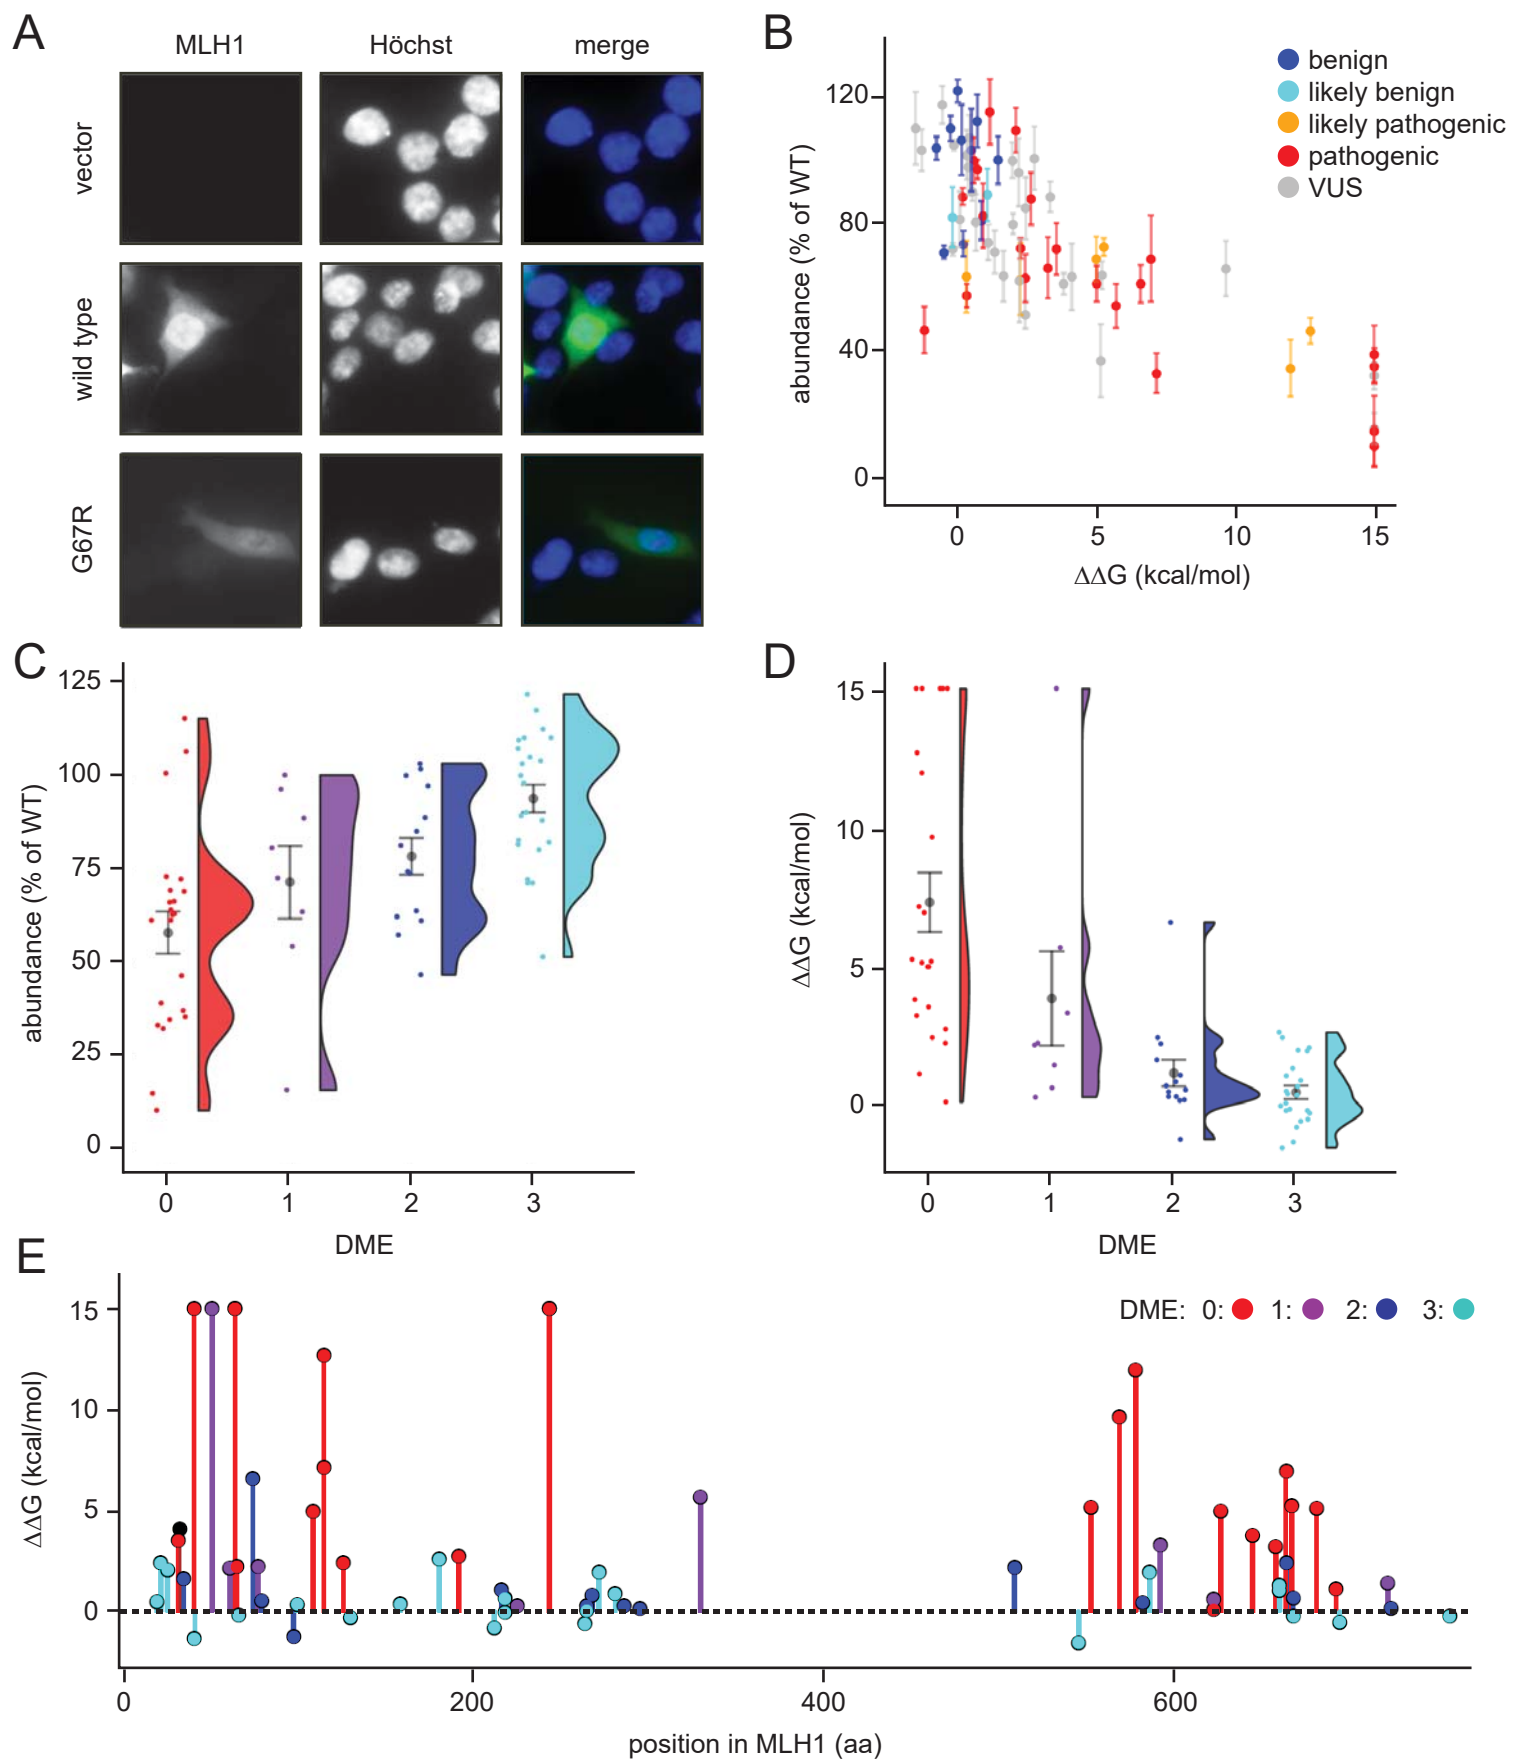

Figure 3

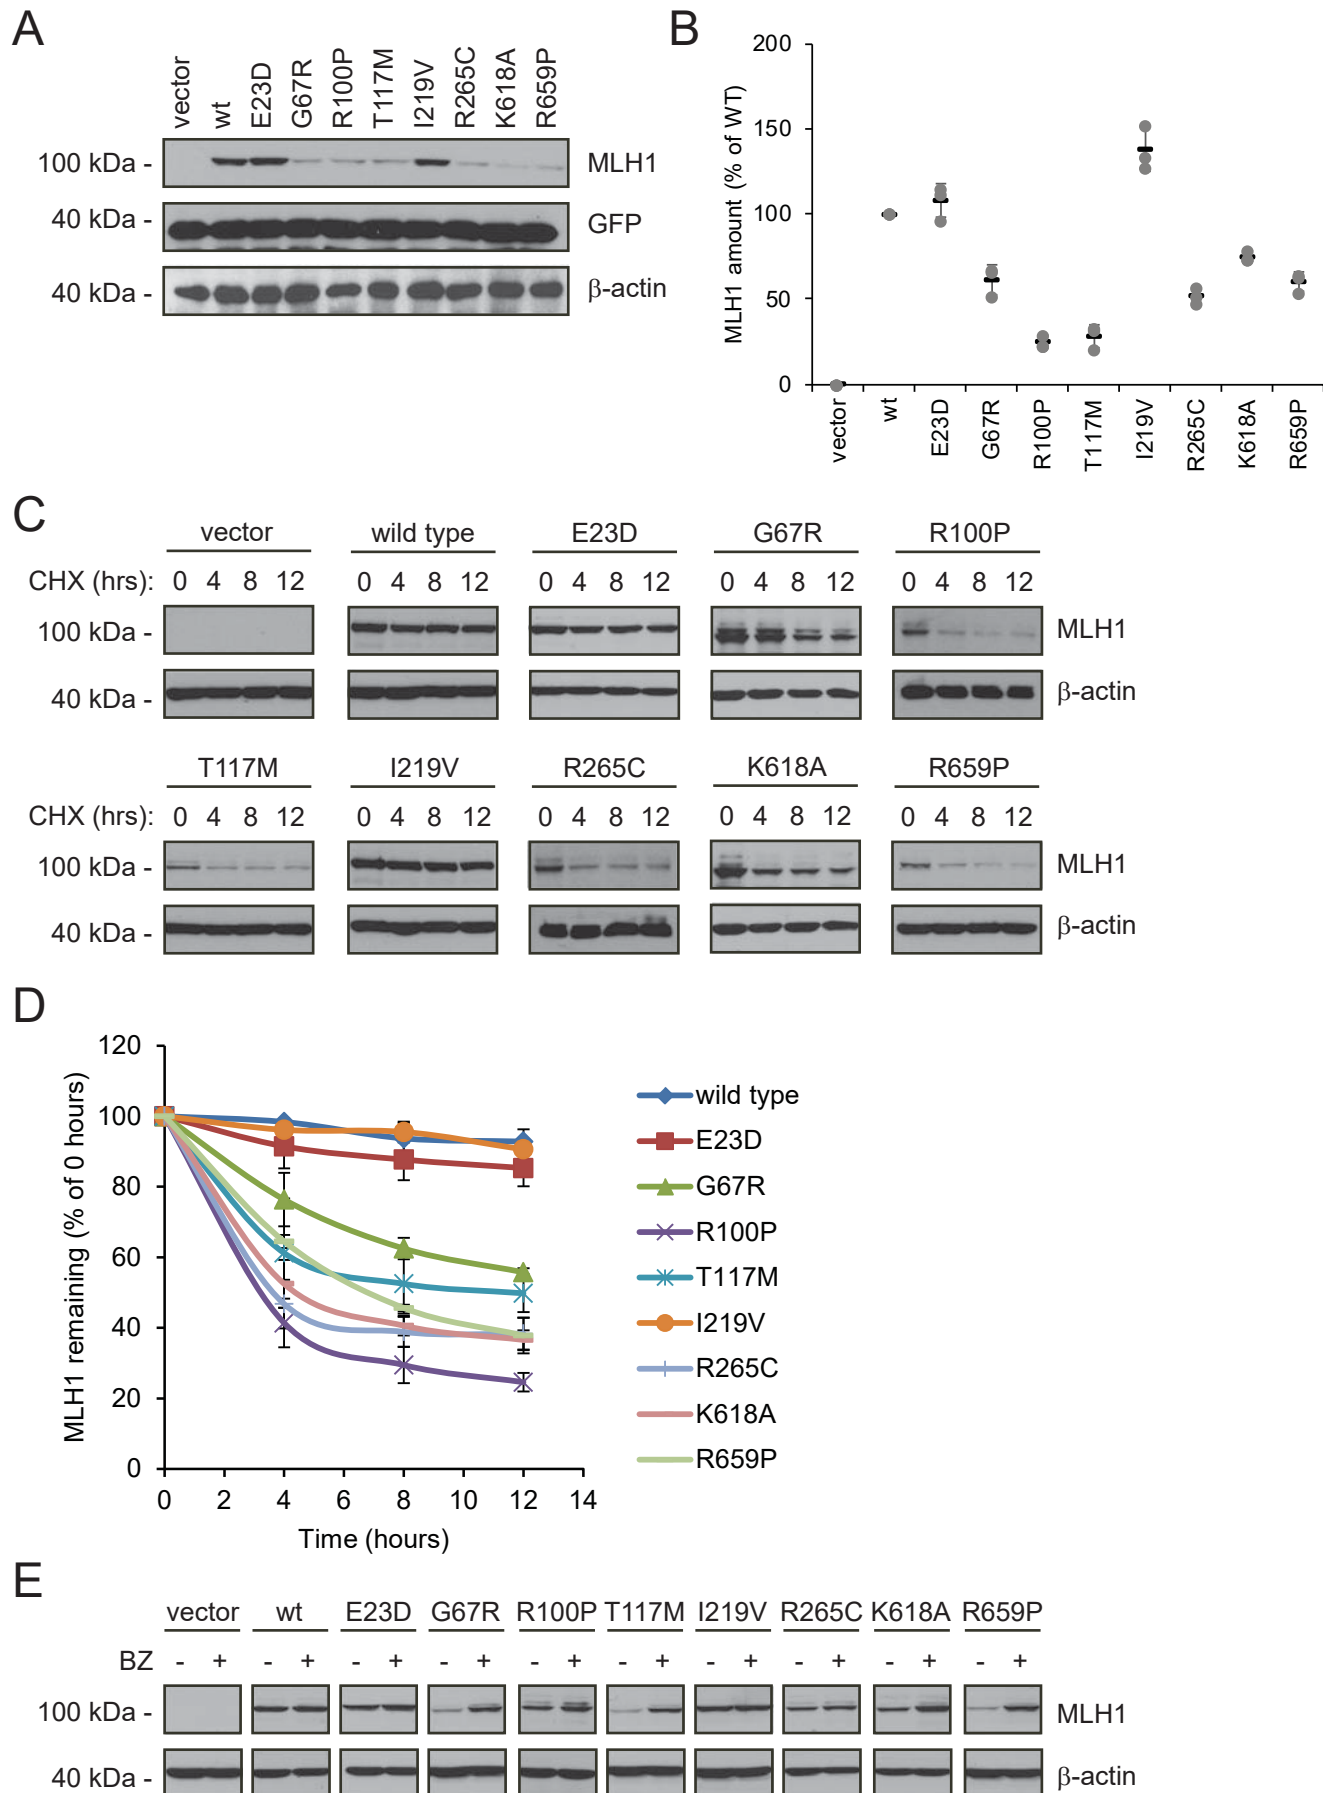



Figure 4

**A**

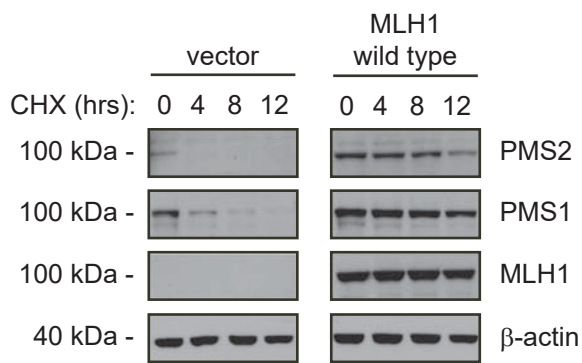

**B**

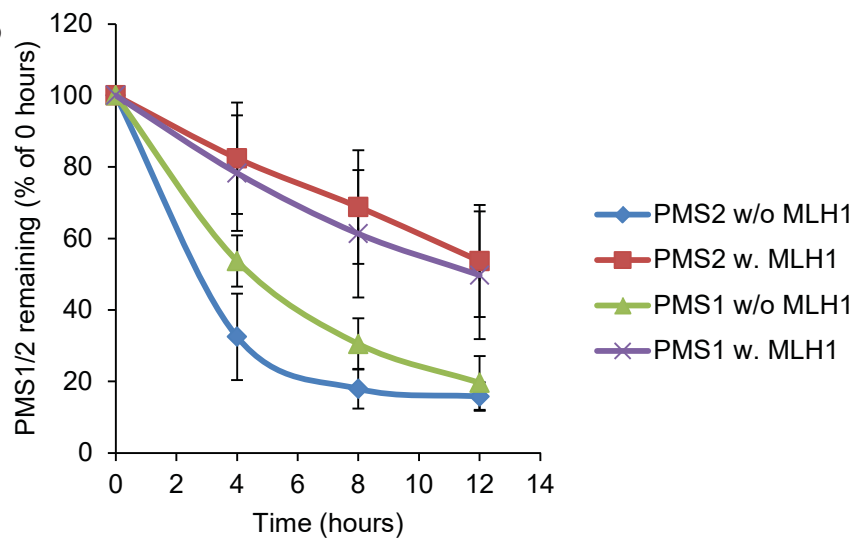

**C**

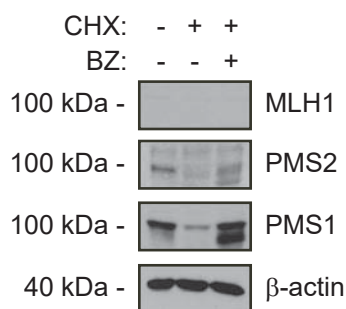

**D**

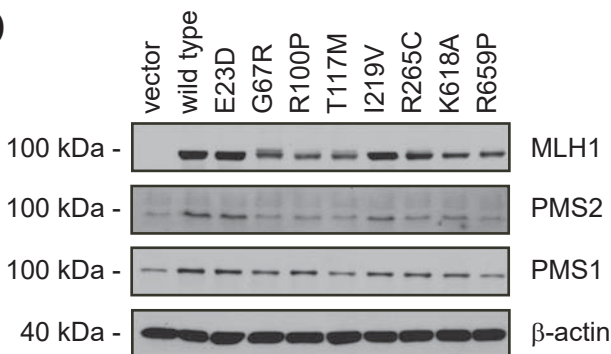

**E**

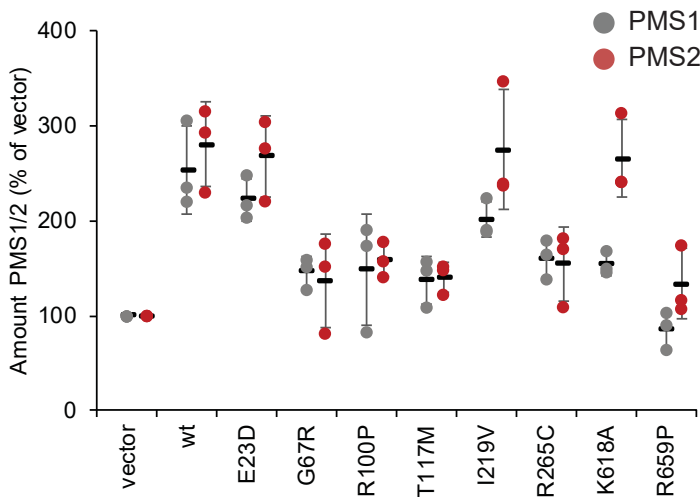

**F**

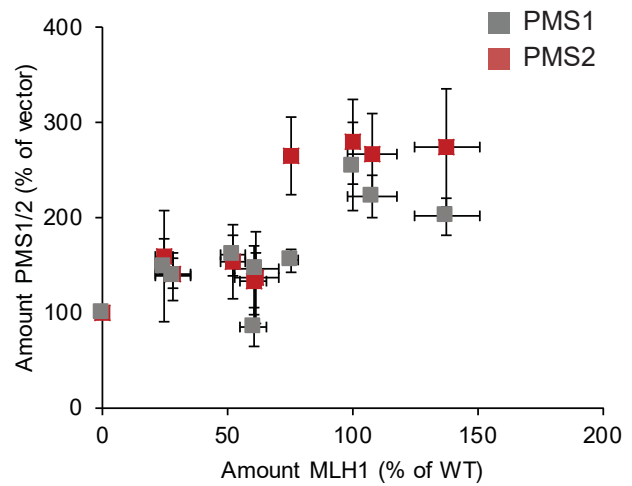

**G**

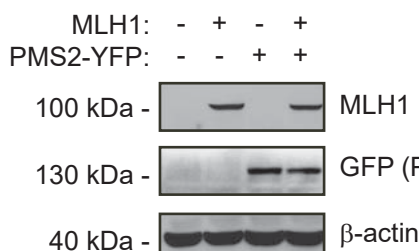

**H**

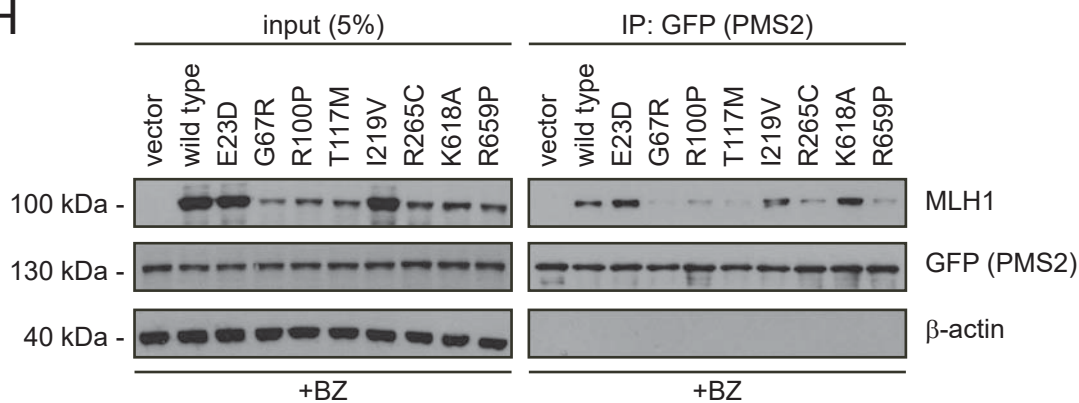

Figure 5

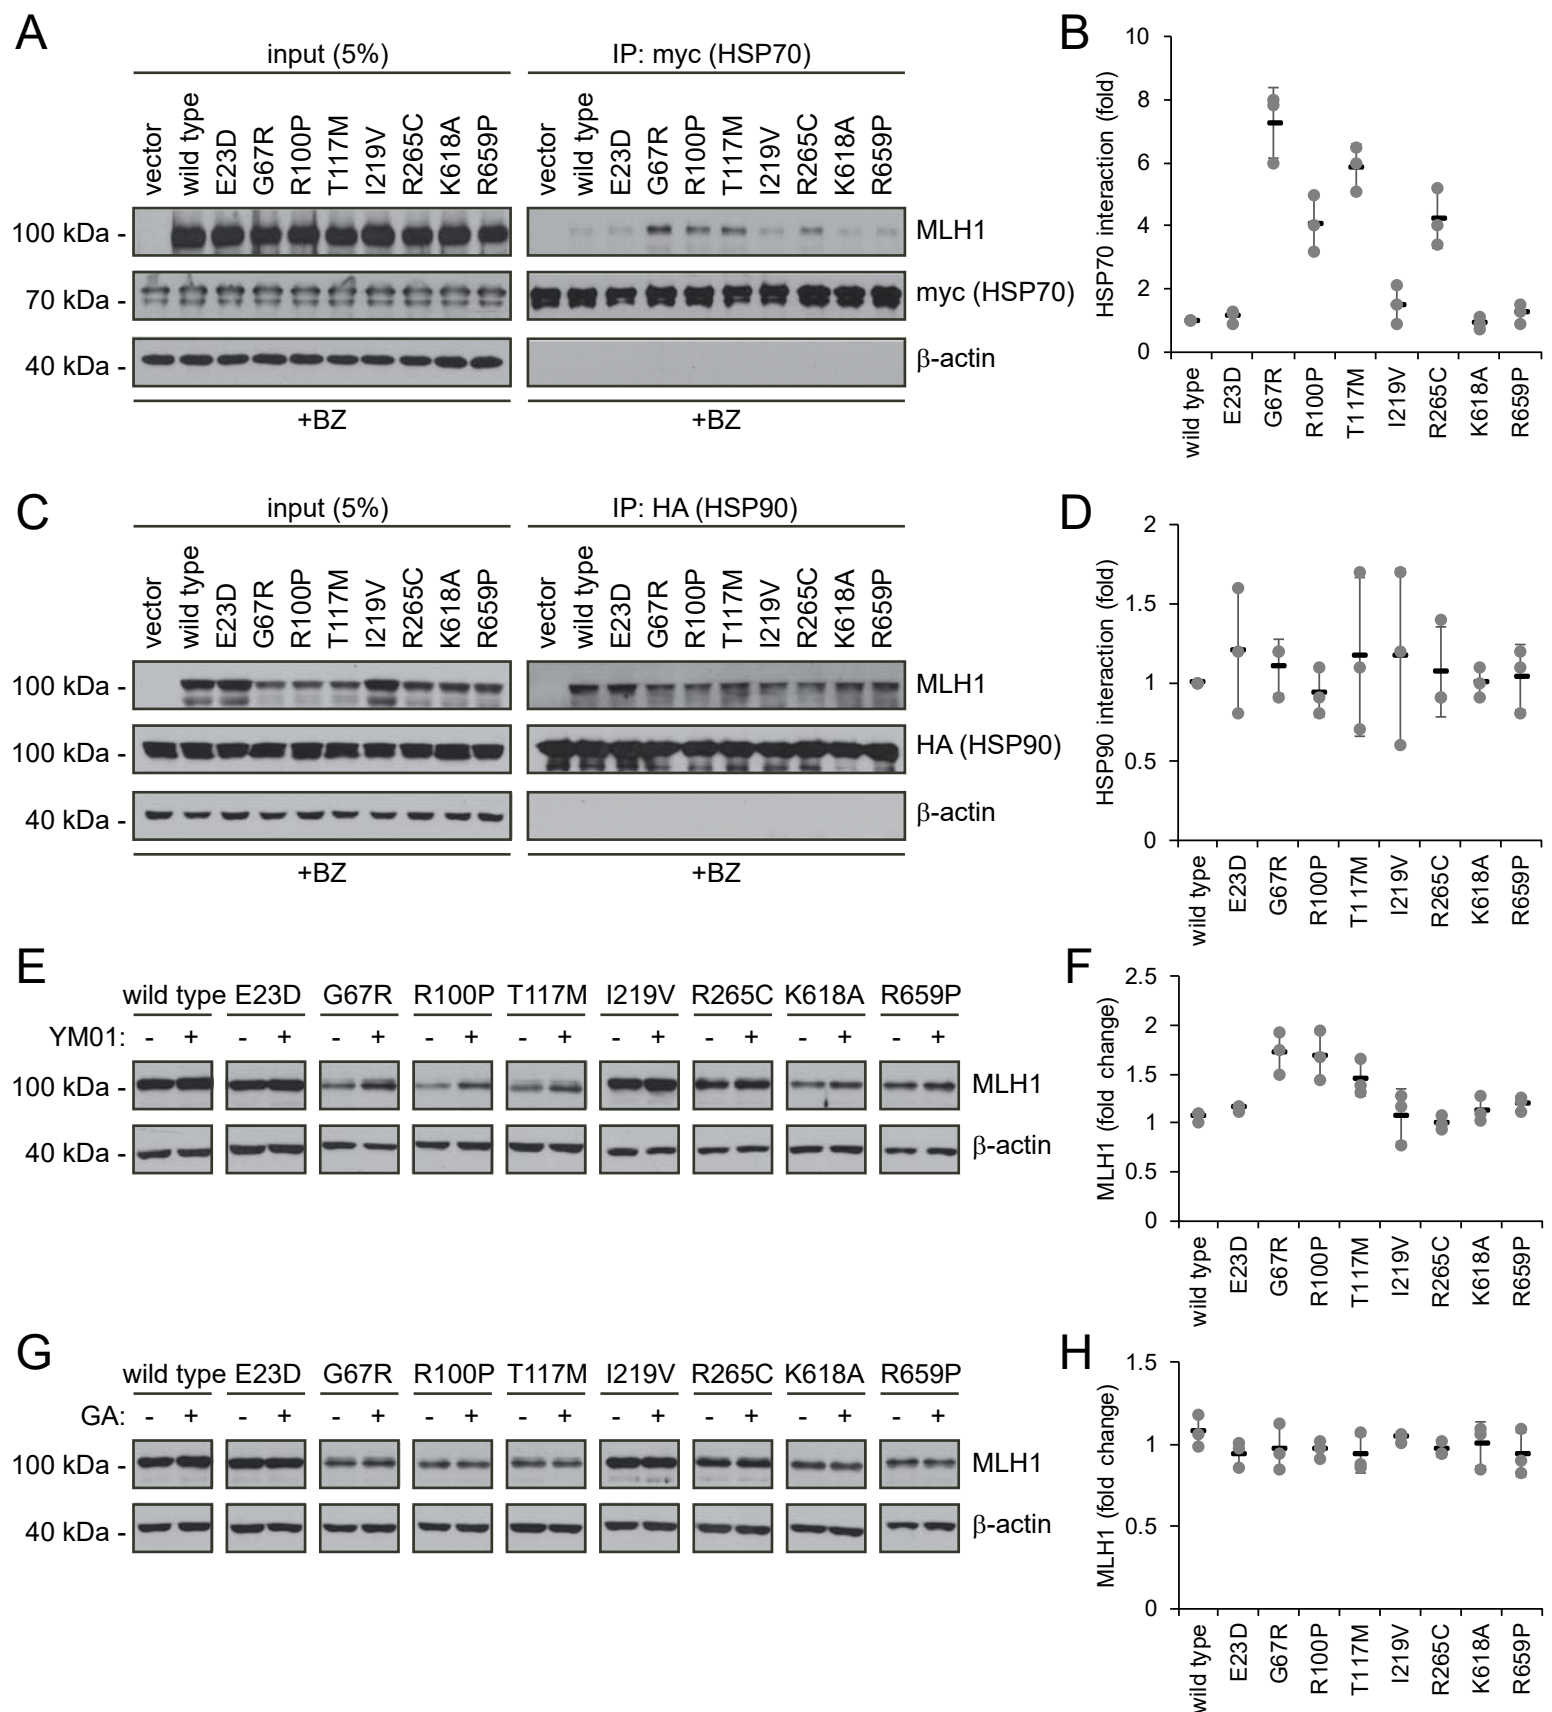

Figure 6

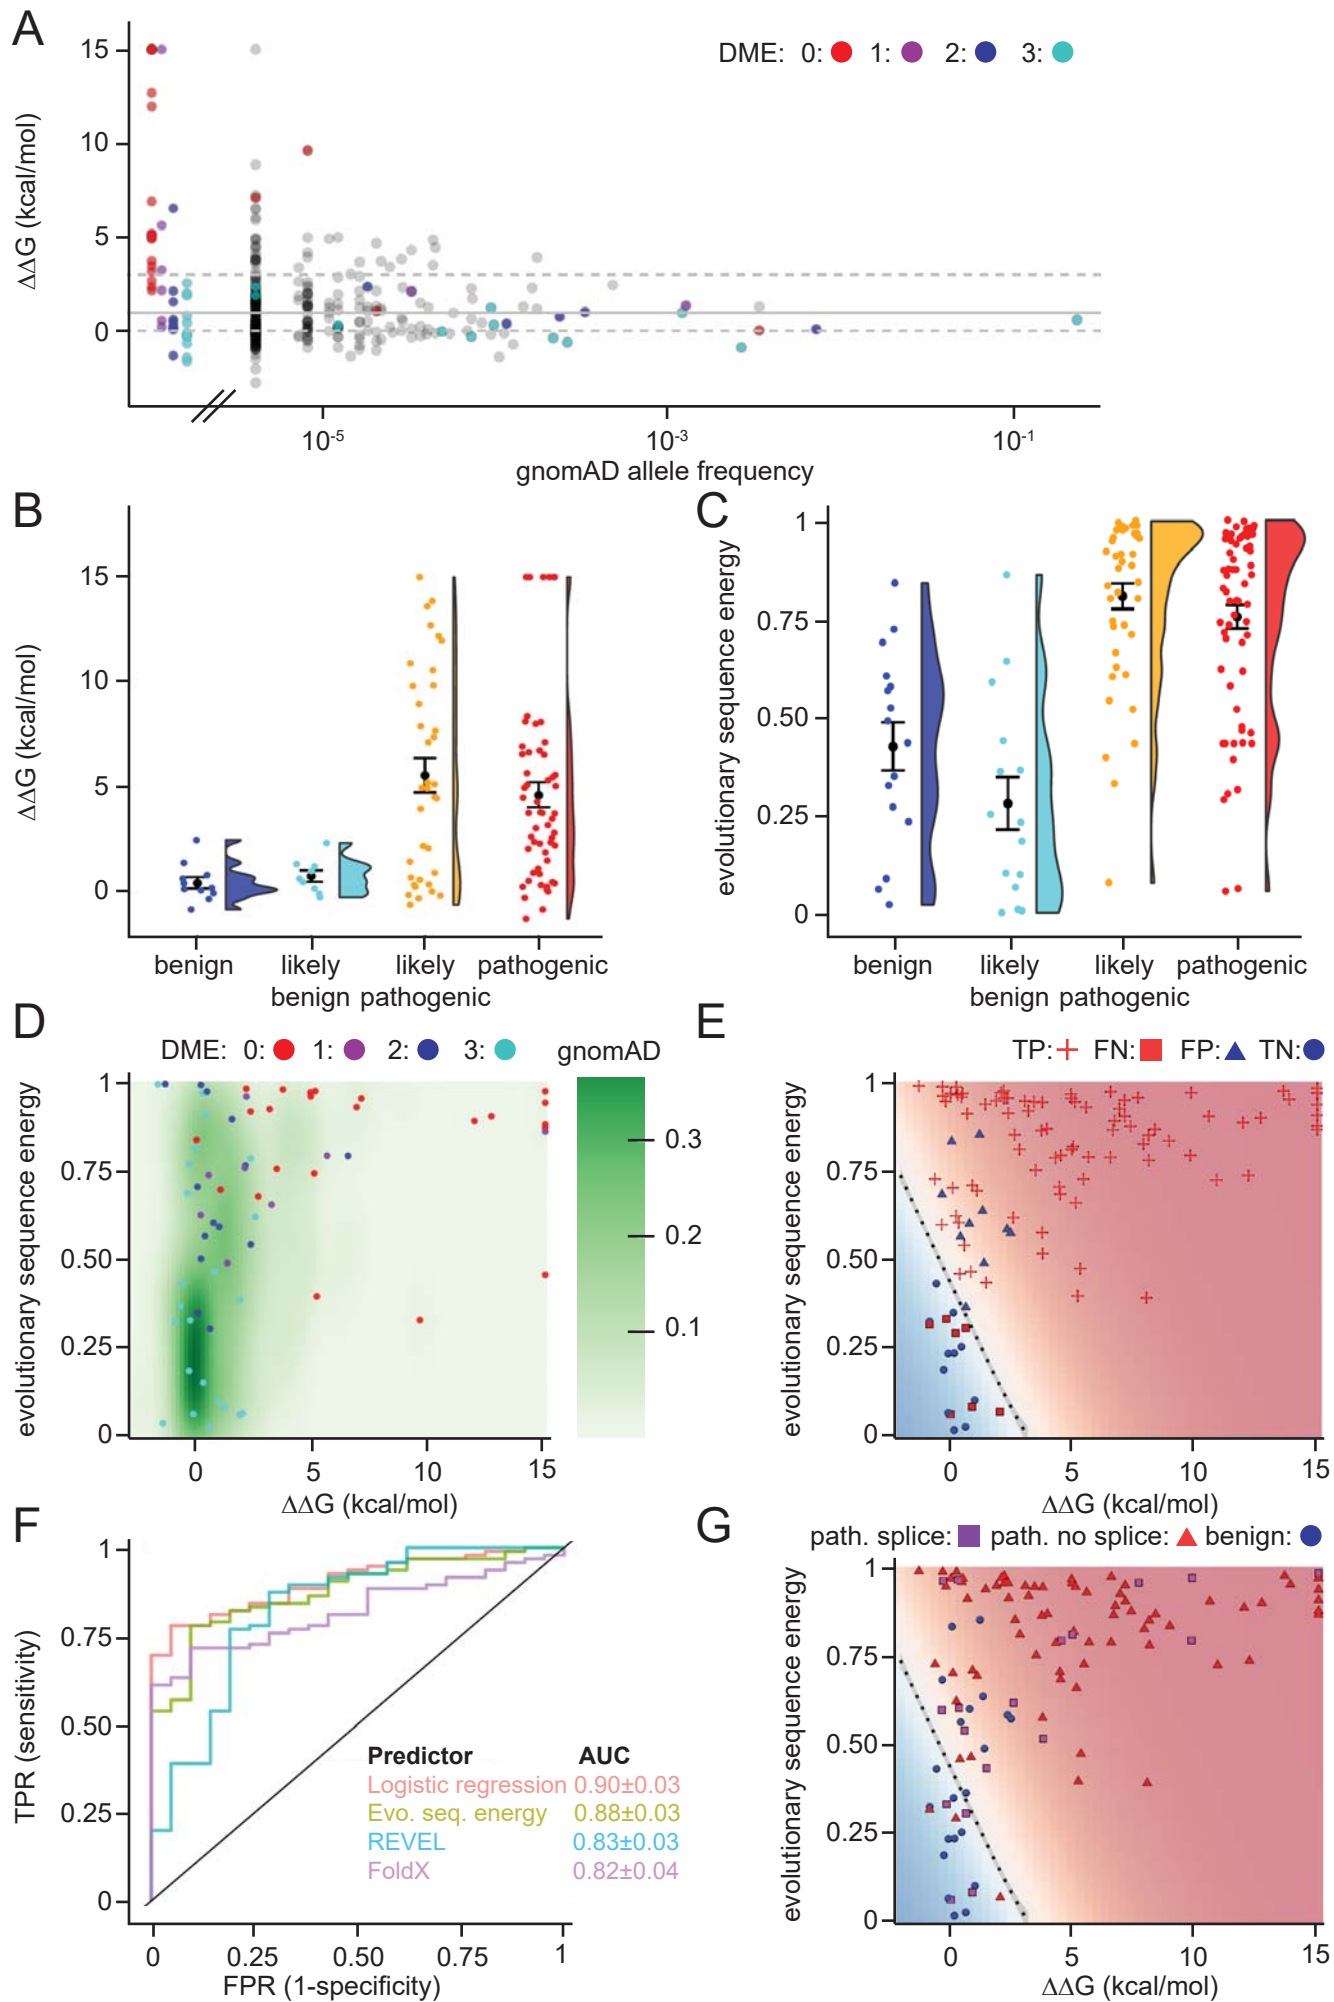

Figure 7

Wild-type  
stable variants

Disease-linked  
unstable variants

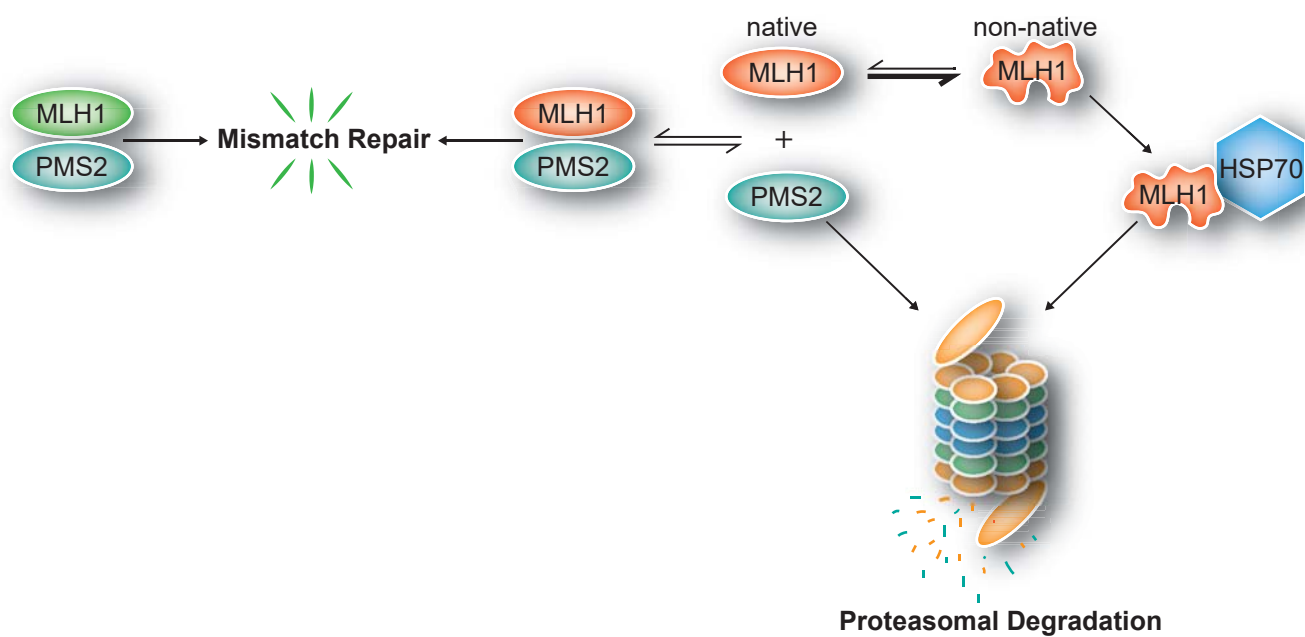

Source: https://www.biorxiv.org/content/biorxiv/early/2019/10/13/622266.full.pdf
